# Supplementary material for: A retrospective cross-sectional study of risk factors and clinical spectrum of children admitted to hospital with pandemic H1N1 influenza as compared to influenza A
Source: PubMed Central journal article supplement — BMJ Open. 2012 Mar 11;2(2):e000310. doi: 10.1136/bmjopen-2011-000310 (PMC3307038; doi:10.1136/bmjopen-2011-000310), 2012-03-11
Supplement: bmjopen-2011-000310.draft_revisions.pdf [file bmjopen-2011-000310.draft_revisions.pdf]

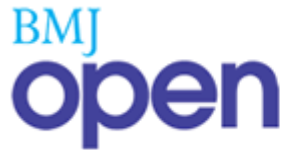

**Advanced age and asthma are associated with severe disease in children with pandemic H1N1 influenza; a retrospective cross sectional study of risk factors for severe pandemic H1N1 influenza in children**

|                                 |                                                                                                                                                                                                                                                                                                                                                                                                                                                                                                                                                                                                                                     |
|---------------------------------|-------------------------------------------------------------------------------------------------------------------------------------------------------------------------------------------------------------------------------------------------------------------------------------------------------------------------------------------------------------------------------------------------------------------------------------------------------------------------------------------------------------------------------------------------------------------------------------------------------------------------------------|
| Journal:                        | <i>BMJ Open</i>                                                                                                                                                                                                                                                                                                                                                                                                                                                                                                                                                                                                                     |
| Manuscript ID:                  | bmjopen-2011-000310                                                                                                                                                                                                                                                                                                                                                                                                                                                                                                                                                                                                                 |
| Article Type:                   | Research                                                                                                                                                                                                                                                                                                                                                                                                                                                                                                                                                                                                                            |
| Date Submitted by the Author:   | 12-Oct-2011                                                                                                                                                                                                                                                                                                                                                                                                                                                                                                                                                                                                                         |
| Complete List of Authors:       | Morris, Shaun; The Hospital for Sick Children, Infectious Diseases<br>Parkin, Patricia; The Hospital for Sick Children, Pediatric Medicine<br>Bridge, Michelle; The Hospital for Sick Children, Infectious Diseases<br>Subbarao, Padmaja; The Hospital for Sick Children, Respiratory Medicine<br>Yau, Yvonne; The Hospital for Sick Children, Microbiology<br>O'Riordan, Sean; Leeds General Infirmary, Pediatrics<br>Barton, Michelle; The Hospital for Sick Children, Infectious Diseases<br>Allen, Upton; The Hospital for Sick Children, Infectious Diseases<br>Tran, Dat; The Hospital for Sick Children, Infectious Diseases |
| <b>Primary Subject Heading</b>: | Paediatrics                                                                                                                                                                                                                                                                                                                                                                                                                                                                                                                                                                                                                         |
| Secondary Subject Heading:      | Infectious diseases                                                                                                                                                                                                                                                                                                                                                                                                                                                                                                                                                                                                                 |
| Keywords:                       | Epidemiology < TROPICAL MEDICINE, H1N1, Influenza, Child                                                                                                                                                                                                                                                                                                                                                                                                                                                                                                                                                                            |
|                                 |                                                                                                                                                                                                                                                                                                                                                                                                                                                                                                                                                                                                                                     |

SCHOLARONE™  
Manuscripts

**A retrospective cross sectional study of children admitted to hospital with pandemic H1N1 influenza; advanced age and asthma are associated with severe disease compared to seasonal influenza**

Shaun Morris<sup>1</sup>, MD, MPH, Patricia Parkin<sup>2</sup>, MD, Michelle Bridge<sup>1</sup>, MD, Padmaja Subbarao<sup>3</sup>, MD, MSc, Yvonne Yau<sup>4</sup>, MD, Sean O’Riordan<sup>5</sup>, MB, BChir, PhD, Michelle Barton<sup>1</sup>, MBBS, DM, Upton Allen<sup>1</sup>, MD, MSc, Dat Tran<sup>1</sup>, MD, MSc

**Abstract Word Count: 252**  
**Manuscript Word Count: 2830**

1. Division of Infectious Diseases, Department of Pediatrics, The Hospital for Sick Children, The University of Toronto. 555 University Avenue, Toronto, Ontario, Canada, M5G 1X8.
2. Division of Pediatric Medicine, Department of Pediatrics, The Hospital for Sick Children, The University of Toronto. 555 University Avenue, Toronto, Ontario, Canada, M5G 1X8.
3. Division of Respiratory Medicine, Department of Pediatrics, The Hospital for Sick Children, The University of Toronto. 555 University Avenue, Toronto, Ontario, Canada, M5G 1X8.
4. Division of Microbiology, Department of Pediatric Laboratory Medicine, The Hospital for Sick Children, The University of Toronto. 555 University Avenue, Toronto, Ontario, Canada, M5G 1X8.
5. Department of Paediatrics, Leeds General Infirmary, Great George Street, Leeds, United Kingdom, LS1 3EX

Keywords: Influenza, H1N1, Child, Epidemiology

Corresponding Author: Dr. Dat Tran, Division of Infectious Diseases, The Hospital for Sick Children, 555 University Avenue, Toronto, Ontario, Canada, M5G 1X8. Email: dat.tran@sickkids.ca. Telephone: (416) 813-6268.

## ABSTRACT

**Objective:** Limited data exist on clinical outcomes and risk factors for severe disease from pandemic H1N1 influenza (pH1N1) versus seasonal influenza in children. This study's objective was to compare risk factors (including age and underlying asthma) for admission to hospital and the intensive care unit (ICU) in children with pH1N1 versus those with seasonal influenza. Secondary goals included comparison of demographic characteristics, clinical features, other markers of illness severity, and effect of antiviral therapy and diagnostic methods on outcomes in children with pH1N1 versus seasonal influenza.

**Design:** Retrospective analysis of children admitted to a pediatric referral hospital with pH1N1 (n=176) versus seasonal influenza A (n=200).

**Results:** Children admitted with pH1N1 were older than seasonal influenza A admissions (hospital admission: 6.5 vs 3.3 years; ICU admission: 7.3 vs 3.6 years). Children hospitalized pH1N1 were more likely to have a pre-existing diagnosis of asthma (15% vs 5%); however there was no difference in the severity of pre-existing asthma between the two groups. After controlling for obesity, asthma (OR 4.59, 95% CI 1.42-14.81) and age > 5 years (OR 2.87, 95% CI 1.60-5.16) were more common as risk factors in admitted children with pH1N1. Asthma was a significant predictor of the need for intensive care in pH1N1 (OR 4.56, 95% CI 1.16-17.89) but not seasonal influenza A patients.

**Conclusion:** While most pH1N1 cases presented with classic influenza-like symptoms, risk factors for severe pH1N1 disease differed from seasonal influenza A. Older age and asthma were associated with increased admission to hospital and ICU for children with pH1N1.

## ARTICLE SUMMARY

### Article focus

- Young age and underlying medical conditions have traditionally been considered risk factors for severe influenza in children.
- Children admitted with H1N1 influenza are more likely to have asthma, however, the impact of asthma severity is unknown.

### Key messages

- The presence of asthma and increased age, but not severity of asthma, were more common as risk factors for hospitalization with severe H1N1 influenza than with seasonal influenza A.
- These results suggest that in future pandemics, certain high-risk groups may be more adversely affected than expected with seasonal influenza.
- Treatment of H1N1 influenza with oseltamivir did not appear to be associated with differing outcomes or severity of disease.

### Strengths and limitations of this study

- The strength of this study is that it compares a large number of children admitted with microbiologically confirmed pH1N1 to those admitted over five years with seasonal influenza A. For each admitted child with suspected asthma, at least two physicians reviewed the case to confirm a diagnosis of pre-existing asthma and to grade the asthma as mild, moderate, or severe.

- 1  
2  
3  
4  
5  
6  
7  
8  
9  
10  
11  
12  
13  
14  
15  
16  
17  
18  
19  
20  
21  
22  
23  
24  
25  
26  
27  
28  
29  
30  
31  
32  
33  
34  
35  
36  
37  
38  
39  
40  
41  
42  
43  
44  
45  
46  
47  
48  
49  
50  
51  
52  
53  
54  
55  
56  
57  
58  
59  
60
- The main limitations to this study include its retrospective design, single-center site, the inability to calculate population-based rates, and that the number of admitted patients with asthma, particularly to ICU, was small.

For peer review only

## INTRODUCTION

1  
2  
3  
4  
5  
6  
7  
8  
9  
10  
11  
12  
13  
14  
15  
16  
17  
18  
19  
20  
21  
22  
23  
24  
25  
26  
27  
28  
29  
30  
31  
32  
33  
34  
35  
36  
37  
38  
39  
40  
41  
42  
43  
44  
45  
46  
47  
48  
49  
50  
51  
52  
53  
54  
55  
56  
57  
58  
59  
60

Infants and young children have traditionally been considered at risk for severe seasonal influenza A.[1-2] It is not known if pandemic H1N1 influenza (pH1N1) has differing risk factors or clinical characteristics compared to seasonal influenza A. Recently published pediatric studies suggest that while most cases of pH1N1 are relatively mild, older children, especially those suffering from asthma and obesity, may be at higher risk for severe disease. Rates of pediatric intensive care admission, mechanical ventilation, and mortality associated with pH1N1 may be higher than those associated with seasonal influenza.[3-5]

A previous study from our center following the first wave of the pandemic found that children admitted with pH1N1 were significantly older and more likely to have asthma than those admitted with seasonal influenza A.[6] In late 2009, a second wave of pH1N1 resulted in more admissions to our hospital. The increase in pH1N1 cases allowed us to verify the findings of our initial study, and identify independent risk factors for admission to the intensive care unit (ICU) among pH1N1 and seasonal influenza hospitalized cases through multivariable analyses. Finally, we wanted to understand how differences in diagnostic methods and treatment between pH1N1 and seasonal influenza might affect outcomes. Thus our primary goals in this study were to compare the age-adjusted proportions of asthmatics among children admitted to hospital and the ICU with pH1N1 relative to those admitted with seasonal influenza, and determine whether age and asthma are independent predictors of ICU admission in pH1N1 as well as seasonal influenza infection. Secondary goals were to describe clinical features, other markers of

1  
2  
3 illness severity, and effect of antiviral therapy and diagnostic methods on outcomes in  
4  
5 children with pH1N1.  
6  
7  
8  
9

## 10 DESIGN

11  
12 We identified and reviewed health records of all laboratory-confirmed cases of  
13  
14 pH1N1 admitted in 2009 to The Hospital for Sick Children (SickKids), a large pediatric  
15  
16 referral hospital in Toronto, Canada with over 14,000 admissions per year.[7] We  
17  
18 compared children admitted with pH1N1 to those admitted with seasonal influenza A  
19  
20 during the 2004-2005 through 2008-2009 influenza seasons. In order to exclude potential  
21  
22 hospital-acquired infections, only children who developed influenza-like symptoms prior  
23  
24 to the third day of admission were included in this study. All patients with influenza-like  
25  
26 illness were initially screened for influenza by direct immunofluorescence assay (DFA).  
27  
28 During the first wave of the pandemic, all inpatient respiratory samples were tested using  
29  
30 reverse transcription polymerase chain reaction (RT-PCR) with primers developed by the  
31  
32 National Microbiology Laboratory, Winnipeg, Manitoba.[8] During the second wave, all  
33  
34 inpatient respiratory samples were tested with a commercial real-time RT-PCR kit (RT-  
35  
36 PCR Kit 1.0, Astra Diagnostics, Hamburg). Seasonal influenza cases were identified  
37  
38 through DFA and/or viral culture. Two physicians (MB and DT) reviewed each potential  
39  
40 case of asthma to confirm the diagnosis and determine severity (Web Table). Any  
41  
42 discrepancies were adjudicated by an asthma specialist (PS).  
43  
44  
45  
46  
47  
48  
49

50 Comparisons were made between the pH1N1 and seasonal influenza A groups  
51  
52 and between the first and second waves of pH1N1. Differences in normally distributed  
53  
54 continuous variables were analyzed using Student's *t* test. Comparisons of skewed data  
55  
56  
57  
58  
59  
60

1  
2  
3 (length of stay and age) were analyzed using non parametric Mann-Whitney and Kruskal-  
4  
5  
6 Wallis methods. The  $\chi^2$  or Fisher's exact test was used to compare categorical variables  
7  
8 between groups and as a test of heterogeneity among multiple proportions. We performed  
9  
10 multivariable logistic regression to 1) adjust for the potential confounding effect of age  
11  
12 (as a continuous variable and categorical variable) on asthma as a risk factor in  
13  
14 comparing the severity of pH1N1 and seasonal influenza; and 2) construct models of risk  
15  
16 for ICU admission in pH1N1 and seasonal influenza A infection that included age (as a  
17  
18 continuous variable and categorical variable), asthma, and obesity as independent  
19  
20 variables. All statistical analysis was performed using Stata SE 10.[9]  
21  
22  
23

24 SM and DT conceived of and designed the study, conducted the analysis,  
25  
26 interpreted the data, and drafted the original manuscript. PP, MB, PS, SO, MB and UA  
27  
28 contributed to the analysis and interpretation of data. All authors critically revised the  
29  
30 article for important intellectual content and gave final approval of the version to be  
31  
32 published. The SickKids Research Ethics Board approved and waived individual  
33  
34 informed consent for this study.  
35  
36  
37  
38  
39  
40

## 41 RESULTS

42  
43 179 children with pH1N1 were admitted in 2009 in two waves (May to July 2009  
44  
45 n=58, September to December 2009 n=118) (Figure 1), of whom 3 were excluded  
46  
47 because the onset of symptoms was more than three days after admission. 200 children  
48  
49 were admitted to hospital with seasonal influenza A over five seasons (2004-2005 n=46;  
50  
51 2005-2006 n=26; 2006-2007 n=36; 2007-2008 n=56; 2008-2009 n=36). There were no  
52  
53  
54  
55  
56  
57  
58  
59  
60



1  
2  
3 differences across the years of seasonal influenza cases in terms of demographic  
4 characteristics, underlying risk factors, or outcomes (data not shown).  
5  
6  
7  
8  
9

### 10 11 12 13 14 15 **Demographic Characteristics**

16  
17 Characteristics of children with pH1N1 and seasonal influenza are shown in Table  
18  
19 1. Children with pH1N1 were significantly older than those with seasonal influenza A  
20 (6.5 vs 3.3 years,  $p$ -value  $<0.01$ ). The proportion of children over 5 years was higher in  
21 pH1N1 (61% vs 38%,  $p < 0.01$ ) whereas the proportion under 2 years was higher in  
22 seasonal influenza A (37% vs 18%,  $p < 0.01$ ). Children admitted to ICU with pH1N1 were  
23 older than those with seasonal influenza A (7.3 vs 3.6 years,  $p = 0.02$ ).  
24  
25  
26  
27  
28  
29  
30  
31  
32  
33

### 34 **Disease Severity**

35  
36 Requirement and duration of oxygen therapy, ICU admission, mechanical  
37 ventilation and total length of hospital stay are shown in Table 1. 59 (34%) patients  
38 admitted with pH1N1 required oxygen supplementation. 32 (18%) children with pH1N1  
39 required admission to ICU and of these, 18 (56%) required mechanical ventilation. There  
40 was no difference in ICU admission or need for mechanical ventilation between pH1N1  
41 and seasonal influenza A. More children admitted during the first wave required oxygen  
42 than those admitted during the second wave (47% vs 28%,  $p = 0.01$ ). When examining  
43 only children who did not receive antiviral therapy, the difference in oxygen use between  
44  
45  
46  
47  
48  
49  
50  
51  
52  
53  
54  
55  
56  
57  
58  
59  
60

1  
2  
3 waves 1 and 2 remained significant (48% vs 19%,  $p=0.03$ ). None of the pH1N1 patients  
4  
5 died.  
6  
7

### 10 **Clinical and Laboratory Characteristics**

11  
12 Most pH1N1 cases presented with fever and cough. More than one-third had  
13 gastrointestinal symptoms (Table 2). The laboratory results of children admitted with  
14 pH1N1 are shown in Table 3. Four patients had positive blood cultures during their  
15 admission (*Streptococcus pneumoniae* (2), Viridans group *Streptococcus* (1),  
16  
17  
18  
19  
20  
21  
22  
23  
24  
25  
26  
27  
28  
29  
30  
31  
32  
33  
34  
35  
36  
37  
38  
39  
40  
41  
42  
43  
44  
45  
46  
47  
48  
49  
50  
51  
52  
53  
54  
55  
56  
57  
58  
59  
60  
*Pseudomonas aeruginosa* (1)).

### 27 **Risk Factors**

28  
29 Children with pH1N1 compared to those with seasonal influenza were more likely  
30 to have history of asthma (15% vs 5%,  $p<0.01$ ); however, there was no difference in the  
31 severity of asthma between the two groups (Table 4). Cardiac disease (11% vs 4%,  
32  
33  
34  
35  
36  
37  
38  
39  
40  
41  
42  
43  
44  
45  
46  
47  
48  
49  
50  
51  
52  
53  
54  
55  
56  
57  
58  
59  
60  
 $p=0.02$ ) and age under 2 years with no other risk factors (18% vs 9%,  $p=0.02$ ) were more  
common in children hospitalized with seasonal influenza. In patients requiring intensive  
care, history of asthma was more common in pH1N1 than in seasonal influenza A;  
however, this difference did not reach statistical significance (19% vs 3%,  $p=0.10$ ).

56  
57  
58  
59  
60  
In a multivariable analysis including obesity, age category, and asthma, both age  
greater than 5 (with age  $\leq 2$  as reference) (OR 2.87 95% CI 1.60-5.16) and history of  
asthma (OR 4.59, 95% CI 1.42-14.81) were more common as risk factors in admitted  
children with pH1N1 compared to seasonal influenza A. In the same analysis but using  
age as a continuous rather than categorical variable, asthma remained more common as a

1  
2  
3 risk factor in pH1N1 (OR 8.77, 95% CI 1.85-41.52). Table 5 displays multivariable  
4  
5 logistic regression analyses for predictors of ICU admission with pH1N1 and with  
6  
7 seasonal influenza A infection. In multivariable models including obesity, age category  
8  
9 and underlying asthma as independent variables, asthma was a significant predictor of the  
10  
11 need for intensive care with pH1N1 infection (OR 4.56, 95% CI 1.16-17.89) but not with  
12  
13 seasonal influenza A infection. When the multivariable models included age as a  
14  
15 continuous instead of categorical variable, underlying asthma remained a significant  
16  
17 predictor of the need for ICU care with pH1N1 infection (OR 5.22, 95% CI 1.23-22.08).  
18  
19

20  
21  
22 In children with asthma, 29% of those with pH1N1 versus 33% of those with  
23  
24 seasonal influenza presented with acute wheeze ( $p=0.81$ ). In children without underlying  
25  
26 asthma, there was no difference in presentation with acute wheeze in those with pH1N1  
27  
28 (15%) and those with seasonal influenza (12%),  $p=0.51$ .  
29  
30  
31

### 32 33 34 **Diagnosis and Management**

35  
36 At our institution, seasonal influenza was diagnosed by DFA supplemented with  
37  
38 viral culture whereas cases positive by DFA for pH1N1 required confirmation by PCR.  
39  
40 To assess the potential impact of differing diagnostic methods, we re-analyzed all cases  
41  
42 restricting solely to those positive by DFA. The only changes from the previously  
43  
44 presented results were that the length of stay in hospital was longer in seasonal influenza  
45  
46 (median 3.5 vs 3 days,  $p=0.03$ ) and that underlying chronic lung disease (excluding  
47  
48 asthma) was no longer significantly more common in those admitted to ICU with  
49  
50 seasonal influenza A ( $p=0.09$ ).  
51  
52  
53  
54  
55  
56  
57  
58  
59  
60

1  
2  
3 Children with pH1N1 were more likely to receive antiviral therapy (61% vs 8%,  
4 p<0.01). There were significant changes in how pH1N1 was managed between waves;  
5  
6 19% of children received antiviral therapy during wave 1 compared to 82% in wave 2 (p  
7  
8 < 0.01). However, when comparing all children with pH1N1 who received antiviral  
9  
10 therapy to those who did not, there were no significant differences in the need for ICU  
11  
12 admission (22% vs 14%, p=0.07), mechanical ventilation (14% vs 8%, p=0.08), or length  
13  
14 of stay in hospital (median duration 3 days vs 3 days, p=0.68). To test if sicker children  
15  
16 received antiviral therapy, we compared all available Canadian Triage and Acuity  
17  
18 Scores[10] (CTAS), a standardized measure of disease acuity, between pH1N1 patients  
19  
20 who did (n=65), and did not (n=42) receive antiviral therapy and did not find a significant  
21  
22 difference between the two groups (p=0.70).  
23  
24  
25  
26  
27  
28  
29  
30  
31

## 32 DISCUSSION

33  
34 Most cases of pH1N1 presented with a classic influenza-like illness, with no  
35  
36 convincing evidence that pH1N1 was more severe than seasonal influenza. However, the  
37  
38 risk factors for admission to hospital and ICU differed between pH1N1 and seasonal  
39  
40 influenza. Older age was a greater risk factor for admission to hospital and ICU for  
41  
42 pH1N1 and asthma was a greater risk factor for hospitalization for pH1N1. These results  
43  
44 corroborate earlier research based on fewer cases from our institution[6] as well as a  
45  
46 recent study from Colorado comparing children admitted to hospital with pH1N1 to those  
47  
48 with 2008-09 seasonal influenza A or B.[11] Conversely, underlying cardiac disease in  
49  
50 those admitted to hospital and non-asthma chronic lung disease in those admitted to ICU  
51  
52 were significantly more common in seasonal influenza. These results suggest that risk  
53  
54  
55  
56  
57  
58  
59  
60

1  
2  
3 factors for new influenza strains and that high-risk groups during future pandemics may  
4  
5 not be simply extrapolated from the experience with seasonal strains.  
6  
7

8 Guidelines from the Public Health Agency of Canada highlighted children less  
9  
10 than 2 years of age as a high-risk group for pH1N1.[12] However, our results of a median  
11  
12 age of 6.5 years in hospitalized pH1N1 patients is remarkably similar to studies from  
13  
14 California[13] (median age 6 years) and Japan[14] (median age 7 years). While we found  
15  
16 the proportion of hospitalized cases higher in older age categories in pH1N1, in the  
17  
18 absence of community population-based epidemiologic data, we are not able to comment  
19  
20 on any differences that may exist in age-specific attack, hospitalization, or ICU admission  
21  
22 rates in our study population.  
23  
24  
25  
26

27 This study was not designed to identify the impact of differing management  
28  
29 strategies on severity and outcomes of pH1N1. However, in contrast to the first study  
30  
31 from our centre, in this study, differences in antiviral use between waves allowed for an  
32  
33 interesting natural experiment. Overall, during the first wave, 0%, 46%, and 14% of  
34  
35 children aged under 2 years, 2 to 4 years, and 5 years and over respectively received  
36  
37 oseltamivir. During the second wave, 65%, 88%, and 86% of children under 2 years, 2 to  
38  
39 4 years, and 5 years and over respectively received antiviral therapy. While there was no  
40  
41 difference in markers of disease severity including ICU admission, mechanical  
42  
43 ventilation, and length of hospital stay between the two pandemic waves, there was a  
44  
45 greater need for oxygen in children hospitalized during wave 1. This difference only  
46  
47 remained significant when restricting the analysis to those who did not receive antiviral  
48  
49 therapy. This finding may reflect increased antiviral use directed at sicker children during  
50  
51 wave 2, while the mildest cases did not receive antivirals.  
52  
53  
54  
55  
56  
57  
58  
59  
60

1  
2  
3  
4  
5  
6  
7  
8  
9  
10  
11  
12  
13  
14  
15  
16  
17  
18  
19  
20  
21  
22  
23  
24  
25  
26  
27  
28  
29  
30  
31  
32  
33  
34  
35  
36  
37  
38  
39  
40  
41  
42  
43  
44  
45  
46  
47  
48  
49  
50  
51  
52  
53  
54  
55  
56  
57  
58  
59  
60

In the previous analysis of the first wave of pH1N1 in Toronto, asthma was a more significant risk factor for pH1N1 than for seasonal influenza.[6] In this study, with more than 3 times the number of pH1N1 cases, we confirm the significance of asthma as a major risk factor; controlling for obesity and age (as a continuous variable) asthma was more likely to be present in hospitalized children with pH1N1 (OR 4.59, 95% CI 1.42-14.81 than with seasonal influenza A. In pH1N1 cases, asthma was associated with admission to ICU (OR 4.56, 95% CI 1.16-17.89). This is in contrast to seasonal influenza A in which underlying asthma was not significantly associated with ICU admission (OR 2.47, 95% CI 0.24-25.80). We did not find that the severity of asthma was differentially associated with hospitalization or ICU admission between pH1N1 and seasonal influenza. While 6 (19%) ICU admissions with pH1N1 had asthma (4 mild, 1 moderate, and 1 severe) compared to only 1 (3%) (mild) ICU admission with seasonal influenza, the numbers were too small to be able to demonstrate a difference. In a large California study of 345 children hospitalized or who died with pH1N1, 31% of hospitalized children and 34% of ICU and/or fatal cases had asthma.[13] In Japan, 14% of non-severe cases of pH1N1 and 47% of severe cases had asthma,[14] while a United Kingdom study found asthma was present in 16% of children <16 years and 31% of adults.[15] None of these studies examined severity of asthma or the differences between pH1N1 and seasonal influenza.

Immunologic studies of severe pH1N1 cases have shown delayed expression of genes involved in the adaptive immune response, delayed viral clearance, and increased levels of innate immunity mediators involved in the Th1 and Th17 response.[16-17]

Children with underlying asthma and other groups (such as pregnant women) thought to

1  
2  
3 be at higher risk for severe pH1N1 disease[18-20] may have an altered immunologic and  
4  
5 inflammatory response to this virus resulting in increased disease severity. Interleukin-5  
6  
7 (IL-5) has been shown to be highly expressed in bronchial mucosa of asthmatics,[21] is a  
8  
9 key player in eosinophilic inflammation,[22] and has been found to be higher in serum of  
10  
11 pH1N1 patients with pneumonia than those without.[23] However, further research is  
12  
13 needed to fully understand this association. While there is some evidence in adults that  
14  
15 adjuvant corticosteroids in severe pH1N1 may increase mortality,[24] the impact of  
16  
17 inhaled corticosteroids in childhood asthma on pH1N1 severity is not known and this  
18  
19 study was not designed nor powered to address this question.  
20  
21  
22  
23

24  
25 Influenza vaccination coverage in asthmatic children has been poor in many  
26  
27 countries.[25,26] Some physicians remain skeptical of the need for vaccinating all  
28  
29 asthmatic children [27], while others tend to prioritize children with more severe  
30  
31 asthma.[28] Definitive data has been elusive [29]. Our findings suggest that physicians  
32  
33 should ensure all asthmatic children under their care have been vaccinated against pH1N1  
34  
35 (which is currently included in the standard seasonal influenza vaccine), regardless of  
36  
37 severity of asthma, at least until randomized controlled trial data becomes available.  
38  
39

40  
41 There are several limitations to this study including its retrospective design,  
42  
43 single-center site, and inability to calculate population-based rates. The number of  
44  
45 admitted patients with asthma, particularly to ICU, was small, and this may have  
46  
47 hindered our ability to identify differences in risk based on severity. Additionally, we  
48  
49 identified only the single most important underlying risk factor (with the exception of  
50  
51 asthma, obesity, and age which were all collected for each patient) and thus, we were  
52  
53 unable to explore interactions between risk factors in patients with multiple co-  
54  
55  
56  
57  
58  
59  
60

1  
2  
3 morbidity. Our metrics of influenza severity—ICU admission and duration of stay—may  
4 be impacted by non-medical factors such as bed availability. In regards to oxygen use, we  
5 did not have data on oximetry or criteria that were used by physicians to start or stop  
6 oxygen supplementation and thus it was difficult to determine the significance of the  
7 difference seen in wave 1 versus wave 2. In regards to oseltamivir use, we did not extract  
8 data on dosage, duration, or when the medication was begun. However, the use of  
9 oseltamivir in this study was at the discretion of the attending physician and thus  
10 reflective of ‘real life’ use.  
11  
12  
13  
14  
15  
16  
17  
18  
19  
20  
21  
22  
23  
24  
25  
26

## 27 CONCLUSION

28  
29 Risk factors for severe disease, specifically the presence of underlying asthma  
30 and increased age, differed between pH1N1 and seasonal influenza in children. There  
31 was no difference in overall disease severity. These results suggest that in future  
32 pandemics with new influenza strains, high-risk groups may be different than those  
33 traditionally considered as such. The reasons for the differing influence of asthma and  
34 age on host response to pH1N1 are not understood and further study of the underlying  
35 mechanisms contributing to these differences may shed new light on the host-pathogen  
36 immunobiology of a pandemic strain of influenza virus. This study emphasizes the need  
37 to ensure that all asthmatic children have been vaccinated against pH1N1 influenza,  
38 regardless of the severity of their asthma.  
39  
40  
41  
42  
43  
44  
45  
46  
47  
48  
49  
50  
51  
52  
53  
54  
55  
56  
57  
58  
59  
60



| Characteristic                      | pH1N1 Wave 1 versus Wave 2 |                     |                 | pH1N1 versus Seasonal Influenza A |                      |                 |
|-------------------------------------|----------------------------|---------------------|-----------------|-----------------------------------|----------------------|-----------------|
|                                     | 1st Wave<br>(n=58)         | 2nd Wave<br>(n=118) | p<br>value      | pH1N1<br>(n=176)                  | Seasonal<br>(n=200)  | p<br>value      |
| Sex, male, no. (%)                  | 35 (60)                    | 72 (61)             | 0.93            | 107 (61)                          | 108 (54)             | 0.18            |
| Age, yr, median (IQR)               | 6.4 (3.4-10.1)             | 6.5 (2.9-11.4)      | 0.81            | <b>6.5 (3.0-10.6)</b>             | <b>3.3 (1.4-7.8)</b> | <b>&lt;0.01</b> |
| Age group, yr, no (%)               |                            |                     |                 |                                   |                      |                 |
| <2                                  | 8 (14)                     | 23 (19)             | 0.35            | <b>31(18)</b>                     | <b>74(37)</b>        | <b>&lt;0.01</b> |
| 2 to 5                              | 13 (22)                    | 24 (20)             | 0.75            | 37(21)                            | 54(27)               | 0.18            |
| >5                                  | 37 (64)                    | 71 (60)             | 0.64            | <b>108(61)</b>                    | <b>72(36)</b>        | <b>&lt;0.01</b> |
| Admitted to ICU                     |                            |                     |                 |                                   |                      |                 |
| No. (%) of children                 | 12 (21)                    | 20 (17)             | 0.36            | 32 (18)                           | 31 (15)              | 0.49            |
| Age, yr, median (IQR)               | 5.8 (3.2-7.3)              | 9.2 (5.4-11.4)      | 0.13            | <b>7.3 (4.0-10.6)</b>             | <b>3.6 (1.5-9.7)</b> | <b>0.02</b>     |
| Required Mechanical Ventilation     |                            |                     |                 |                                   |                      |                 |
| No. (%) of children                 | 7 (12)                     | 11 (9)              | 0.57            | 18 (10)                           | 19 (10)              | 0.81            |
| No. (%) of children admitted to ICU | 7 (58)                     | 11 (55)             | 0.85            | 18 (56)                           | 19 (61)              | 0.69            |
| Required Supplemental Oxygen        |                            |                     |                 |                                   |                      |                 |
| No. (%) of children                 | 26 (47)                    | 33 (28)             | 0.01            | 59 (34)                           |                      |                 |
| Duration of Oxygen, d, median (IQR) | 4 (2-6)                    | 3(2-7)              | 0.73            | 3 (2-6)                           |                      |                 |
| Length of stay, d, median (IQR)     |                            |                     |                 |                                   |                      |                 |
| In hospital                         | 4 (2-6)                    | 3 (2-5)             | 0.06            | 3 (2-5)                           | 4 (2-7)              | 0.12            |
| In ICU                              | 3.5 (2.5-17)               | 2 (1.5-5)           | 0.08            | 3 (2-8)                           | 2 (1-5)              | 0.24            |
| Antiviral therapy No. (%)           | <b>11 (19)</b>             | <b>97 (82)</b>      | <b>&lt;0.01</b> | <b>108 (61)</b>                   | <b>16 (8)</b>        | <b>&lt;0.01</b> |

Table 1: Demographic and Clinical Characteristics of Pandemic H1N1 and Seasonal Influenza A

| Clinical Presentation | Number (%)  |             |         |             |
|-----------------------|-------------|-------------|---------|-------------|
|                       | 0 to <2 yrs | 2 to <5 yrs | >5 yrs  | 0 to 18 yrs |
| Fever                 | 31 (100)    | 36 (97)     | 99 (92) | 166 (94)    |
| Cough                 | 29 (94)     | 34 (92)     | 84 (78) | 147 (84)    |
| Gastrointestinal      | 14 (45)     | 16 (43)     | 40 (37) | 70 (40)     |
| Wheeze                | 4 (13)      | 8 (22)      | 24 (22) | 36 (20)     |
| Pneumonia             | 11 (35)     | 12 (32)     | 29 (27) | 52 (30)     |
| Apnea                 | 3 (10)      | 3 (8)       | 2 (2)   | 8 (5)       |
| Seizure               | 2 (7)       | 5 (14)      | 2 (2)   | 9 (5)       |
| Encephalopathy        | 1 (3)       | 1 (3)       | 2 (2)   | 4 (2)       |
| Myocarditis           | 0 (0)       | 1 (3)       | 1 (1)   | 2 (1)       |
| Myositis              | 0 (0)       | 0 (0)       | 2 (2)   | 2 (1)       |

Table 2: Clinical Symptoms of Pandemic H1N1 by Age Category

| Lab Value                                   | Number (%) |
|---------------------------------------------|------------|
| White blood cells $\geq 11.0 \times 10^9/L$ | 50 (29)    |
| White blood cells $< 4.0 \times 10^9/L$     | 33 (19)    |
| Absolute neutrophils $>6.6 \times 10^9/L$   | 59 (35)    |
| Absolute neutrophils $<1.5 \times 10^9/L$   | 30 (18)    |
| Absolute lymphocytes $< 1.8 \times 10^9/L$  | 112 (66)   |

Table 3: Haematologic laboratory values of children admitted with pH1N1

Footnote: 174 children had complete blood count and 170 had differential performed.

| Risk Factor                      | All Children Admitted to Hospital |                   |                 | Children Admitted to ICU |                  |             |
|----------------------------------|-----------------------------------|-------------------|-----------------|--------------------------|------------------|-------------|
|                                  | pH1N1<br>n=176                    | Seasonal<br>n=200 | p value         | pH1N1<br>n=32            | Seasonal<br>n=31 | p value*    |
| Asthma <sup>§</sup>              | <b>26 (15)<sup>#</sup></b>        | <b>9 (5)</b>      | <b>&lt;0.01</b> | 6 (19)                   | 1 (3)            | 0.10        |
| Mild Asthma                      | 16(62)                            | 7(78)             | 0.38            | 4(67)                    | 1(100)           | 1.00        |
| Moderate Asthma                  | 6(23)                             | 1(11)             | 0.44            | 1 (17)                   | 0(0)             | 1.00        |
| Severe Asthma                    | 4 (15)                            | 1(11)             | 0.75            | 1(17)                    | 0(0)             | 1.00        |
| Chronic Lung Disease             | 12 (7)                            | 13 (7)            | 0.92            | <b>0 (0)</b>             | <b>5 (16)</b>    | <b>0.02</b> |
| Obesity <sup>†</sup>             | 8(7)                              | 14(9)             | 0.64            | 3 (20)                   | 2 (9)            | 0.38        |
| Cardiac Disease                  | <b>7 (4)</b>                      | <b>21 (11)</b>    | <b>0.02</b>     | 3 (9)                    | 4 (12)           | 0.71        |
| Hemoglobinopathy                 | 19 (11)                           | 22 (11)           | 0.95            | 1 (3)                    | 1 (3)            | 0.75        |
| Immunodeficiency                 | 32 (18)                           | 42 (21)           | 0.49            | 1 (3)                    | 2 (3)            | 0.61        |
| Neurologic Impairment            | 21 (12)                           | 26 (13)           | 0.76            | 6 (19)                   | 8 (26)           | 0.56        |
| Age <2 and no other risk factors | <b>16 (9)</b>                     | <b>35 (18)</b>    | <b>0.02</b>     | 2 (6)                    | 4 (13)           | 0.43        |

Table 4<sup>^</sup>: Risk Factors for Admission to Hospital and Intensive Care Unit, Pandemic H1N1 versus Seasonal Influenza A

Footnotes: # Percentages in parentheses. \*Fisher's exact test used when cell size is small. †Obesity was defined according to

guidelines from the Centers for Disease Control as a body mass index  $\geq 95^{\text{th}}$  percentile for age in children older than 2 years.[30]

Obesity could not be calculated for 45(31%) & 68(54%) children > 2 years in the seasonal and pH1N1 groups respectively. ^ Any

1  
2  
3  
4  
5 differences between the numbers presented in Table 4 and those from O’Riordan et al. [6] are the result of a re-assessment of all  
6  
7 pH1N1 and seasonal influenza cases for this study.  
8  
9  
10  
11  
12  
13  
14  
15  
16  
17  
18  
19  
20  
21  
22  
23  
24  
25  
26  
27  
28  
29  
30  
31  
32  
33  
34  
35  
36  
37  
38  
39  
40  
41  
42  
43  
44  
45  
46  
47  
48  
49

For peer review only

1  
2  
3  
4  
5  
6  
7  
8  
9  
10  
11  
12  
13  
14  
15  
16  
17  
18  
19  
20  
21  
22  
23  
24  
25  
26  
27  
28  
29  
30  
31  
32  
33  
34  
35  
36  
37  
38  
39  
40  
41  
42  
43  
44  
45  
46  
47  
48  
49

|                     | pH1N1             | Seasonal Influenza |
|---------------------|-------------------|--------------------|
| Risk Factor         | OR (95% CI)       | OR (95% CI)        |
| Asthma <sup>^</sup> | 4.56 (1.16-17.89) | 2.47 (0.24-25.80)  |
| Obesity             | 4.18 (0.76-22.95) | 1.06 (0.20-5.64)   |
| Age 0 to <2 Years   | 1.00              | 1.00               |
| Age 2 to < 5 Years  | 1.70 (0.30-9.48)  | 1.40 (0.44-4.44)   |
| Age >5 Years        | 0.89 (0.19-4.07)  | 0.62 (0.19-1.98)   |

Table 5: Multivariable Regression of Asthma, Obesity, and Age Category as Risk Factors for ICU Admission with Pandemic H1N1 and Seasonal Influenza A.

Footnote: ^ Asthma was also common as a risk factor (OR 8.77, 95% CI 1.85-41.52) for admission to hospital in pH1N1 compared to seasonal influenza (with age as continuous variable)

## Acknowledgements

The authors would like to thank all members of the microbiology laboratory at The Hospital for Sick Children for their hard work, excellence, and dedication during the H1N1 pandemic. The authors would also like to thank research nurses Suganya Lee and Kim Simpson for their significant contributions, graduate student Michelle Gaffey for statistical support, and An Nguyen and Michelle Guanzon for editorial assistance.

## Competing Interests

None of the authors have any competing interests of conflicts to declare.

## Funding

Dr. Morris is a Fellow of the Paediatric Scientist Development Program and is supported by grants Sick Kids Foundation, Paediatric Chairs of Canada, and the March of Dimes.

Dr. Tran is funded by SickKids Foundation and Institute of Human Development Child and Youth Health -CIHR New Investigator Grant #XG08-049R, CIHR Catalyst Grant #CAT86860, and the University of Toronto Dean's Fund Pilot Study grant.

## References

- 1 Iskander M, Booy R, Lambert S. The burden of influenza in children. *Curr Opin Infect Dis* 2007;**20**(3):259-263.
- 2 Pickering LK, Baker CJ, Overturth GD, et al editors. Red Book 2009 Report of the Committee on Infectious Diseases. 28th ed. Elk Grove Village, IL: American Academy of Pediatrics; 2009.
- 3 Libster R, Bugna J, Coviello S, et al. Pediatric hospitalizations associated with 2009 pandemic influenza A (H1N1) in Argentina. *N Engl J Med* 2010;**362**(1):45-55.
- 4 Plessa E, Diakakis P, Gardelis J, et al. Clinical Features, Risk Factors, and Complications Among Pediatric Patients With Pandemic Influenza A (H1N1). *Clin Pediatr (Phila)* 2010;**49**(8):777-781.
- 5 Kumar S, Havens PL, Chusid MJ, et al. Clinical and epidemiologic characteristics of children hospitalized with 2009 pandemic H1N1 influenza A infection. *Pediatr Infect Dis J* 2010;**29**(7):591-594.
- 6 O'Riordan S, Barton M, Yau Y, et al. Risk factors and outcomes among children admitted to hospital with pandemic H1N1 influenza. *CMAJ* 2010;**182**(1):39-44.
- 7 The Hospital for Sick Children. The Year in Review 2009-2010. The Annual Report of The Hospital for Sick Children. Toronto, Ontario: The Hospital for Sick Children 2010.



1  
2  
3 8 Cutler J, Schleihauf E, Hatchette TF, et al. Investigation of the first cases of human-to-  
4 human infection with the new swine-origin influenza A (H1N1) virus in Canada. *CMAJ*  
5 2009;**181**(3-4):159-163.  
6  
7

8  
9  
10  
11 9 StataCorp. Stata statistical software: Release 10. 2007.  
12

13  
14  
15 10 Warren DW, Jarvis A, LeBlanc L, et al. Revisions to the Canadian Triage and Acuity  
16 Scale paediatric guidelines (PaedCTAS). *CJEM* 2008;**10**(3):224-243.  
17

18  
19  
20  
21 11 Bagdure D, Curtis DJ, Dobyns E, et al. Hospitalized children with 2009 pandemic  
22 influenza A (H1N1): comparison to seasonal influenza and risk factors for admission to  
23 the ICU. *PLoS One* 2010; **5**(12):e15173.  
24  
25

26  
27  
28  
29 12 Public Health Agency of Canada. Clinical recommendations for patients presenting  
30 with respiratory symptoms during the 2009–2010 influenza season. 2010; Available at:  
31  
32 [http://www.phac-aspc.gc.ca/alert-alerte/h1n1/pdf/H1N1\\_DecisionTree\\_oct23\\_e.pdf](http://www.phac-aspc.gc.ca/alert-alerte/h1n1/pdf/H1N1_DecisionTree_oct23_e.pdf).  
33  
34

35  
36 Accessed December 3, 2010.  
37

38  
39  
40 13 Louie JK, Gavali S, Acosta M, et al. Children Hospitalized With 2009 Novel  
41 Influenza A(H1N1) in California. *Arch Pediatr Adolesc Med* 2010;**164**(11):1023-1031.  
42  
43

44  
45  
46 14 Okada T, Morozumi M, Matsubara K, et al. Characteristic findings of pediatric  
47 inpatients with pandemic (H1N1) 2009 virus infection among severe and nonsevere  
48 illnesses. *J Infect Chemother* 2011;**17**(2):238-245.  
49  
50

1  
2  
3 15 Nguyen-Van-Tam JS, Openshaw PJ, Hashim A, et al. Risk factors for hospitalisation  
4 and poor outcome with pandemic A/H1N1 influenza: United Kingdom first wave (May-  
5  
6  
7  
8  
9  
10  
11  
12  
13  
14  
15  
16  
17  
18  
19  
20  
21  
22  
23  
24  
25  
26  
27  
28  
29  
30  
31  
32  
33  
34  
35  
36  
37  
38  
39  
40  
41  
42  
43  
44  
45  
46  
47  
48  
49  
50  
51  
52  
53  
54  
55  
56  
57  
58  
59  
60

15 Nguyen-Van-Tam JS, Openshaw PJ, Hashim A, et al. Risk factors for hospitalisation and poor outcome with pandemic A/H1N1 influenza: United Kingdom first wave (May-September 2009). *Thorax* 2010;**65**(7):645-651.

16 Bermejo-Martin JF, Martin-Loeches I, Rello J, et al. Host adaptive immunity deficiency in severe pandemic influenza. *Crit Care* 2010;**14**(5):R167.

17 Bermejo-Martin JF, Ortiz de Lejarazu R, Pumarola T, et al. Th1 and Th17 hypercytokinemia as early host response signature in severe pandemic influenza. *Crit Care* 2009;**13**(6):R201.

18 Louie JK, Acosta M, Jamieson DJ, et al. Severe 2009 H1N1 influenza in pregnant and postpartum women in California. *N Engl J Med* 2010;**362**(1):27-35.

19 Creanga AA, Johnson TF, Graitcer SB, et al. Severity of 2009 pandemic influenza A (H1N1) virus infection in pregnant women. *Obstet Gynecol* 2010;**115**(4):717-726.

20 Siston AM, Rasmussen SA, Honein MA, et al. Pandemic 2009 influenza A(H1N1) virus illness among pregnant women in the United States. *JAMA* 2010; **303**(15):1517-1525.

21 Kotsimbos AT, Hamid Q. IL-5 and IL-5 receptor in asthma. *Mem Inst Oswaldo Cruz* 1997;**92** Suppl 2:75-91.

22 Wang J, Young IG. Eosinophilic inflammation: mechanisms regulating IL-5 transcription in human T lymphocytes. *Allergy* 2007;**62**(10):1131-1138.

1  
2  
3 23 Takano T, Tajiri H, Kashiwagi Y, Kimura S, Kawashima H. Cytokine and chemokine  
4 response in children with the 2009 pandemic influenza A (H1N1) virus infection. *Eur J*  
5  
6  
7  
8 *Clin Microbiol Infect Dis* 2011;**30(1)**:117-120.  
9

10  
11 24 Kim SH, Hong SB, Yun SC, et al. Corticosteroid treatment in critically ill patients  
12 with pandemic influenza A/H1N1 2009 infection: analytic strategy using propensity  
13 scores. *Am J Respir Crit Care Med* 2011;183(9):1207-14.  
14  
15  
16  
17

18  
19  
20 25 Centers for Disease Control and Prevention (CDC) *MMWR Morb Mortal Wkly Rep.*  
21 2007;56(9):193-6.  
22  
23

24  
25 26 Low influenza vaccination coverage in asthmatic children in France in 2006-7. *Euro*  
27 *Surveill.* 2008;13(43):pii:19016  
28  
29

30  
31 32 Bueving HJ. Is influenza vaccination in asthmatic children helpful? *Clin Exp Allergy.*  
33 2006;36(1):21-5.  
34  
35

36  
37 38 Dombkowski KJ, Leung SW, Clark SJ. Physician perspectives regarding annual  
39 influenza vaccination among children with asthma. *Ambul Pediatr.* 2008;8(5):294-9.  
40  
41

42  
43 44 Cates CJ, Jefferson TO, Rowe BH. Vaccines for preventing influenza in people with  
45 asthma. *Cochrane Database Syst Rev.* 2008;(2):CD000364  
46  
47

48  
49 50 Centers for Disease Control (CDC). Defining Childhood Overweight and Obesity.  
51 2010; Available at: <http://www.cdc.gov/obesity/defining.html>. Accessed October 1, 2011.  
52  
53  
54  
55  
56  
57  
58  
59  
60

1  
2  
3  
4  
5  
6  
7  
8  
9  
10  
11  
12  
13  
14  
15  
16  
17  
18  
19  
20  
21  
22  
23  
24  
25  
26  
27  
28  
29  
30  
31  
32  
33  
34  
35  
36  
37  
38  
39  
40  
41  
42  
43  
44  
45  
46  
47  
48  
49  
50  
51  
52  
53  
54  
55  
56  
57  
58  
59  
60

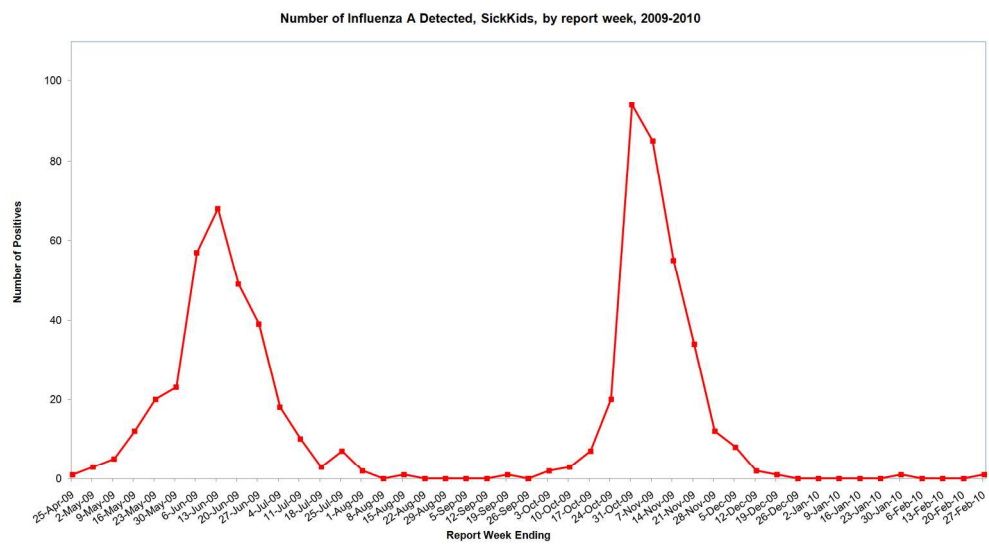

542x315mm (96 x 96 DPI)

view only

STROBE Statement—Checklist of items that should be included in reports of *cross-sectional studies*

|                              | Item No | Recommendation                                                                                                                                                                                                                                                                                                                                                                                                |
|------------------------------|---------|---------------------------------------------------------------------------------------------------------------------------------------------------------------------------------------------------------------------------------------------------------------------------------------------------------------------------------------------------------------------------------------------------------------|
| <b>Title and abstract</b>    | 1 X     | (a) Indicate the study's design with a commonly used term in the title or the abstract<br>(b) Provide in the abstract an informative and balanced summary of what was done and what was found                                                                                                                                                                                                                 |
| <b>Introduction</b>          |         |                                                                                                                                                                                                                                                                                                                                                                                                               |
| Background/rationale         | 2 X     | Explain the scientific background and rationale for the investigation being reported                                                                                                                                                                                                                                                                                                                          |
| Objectives                   | 3 X     | State specific objectives, including any prespecified hypotheses                                                                                                                                                                                                                                                                                                                                              |
| <b>Methods</b>               |         |                                                                                                                                                                                                                                                                                                                                                                                                               |
| Study design                 | 4 X     | Present key elements of study design early in the paper                                                                                                                                                                                                                                                                                                                                                       |
| Setting                      | 5 X     | Describe the setting, locations, and relevant dates, including periods of recruitment, exposure, follow-up, and data collection                                                                                                                                                                                                                                                                               |
| Participants                 | 6 X     | (a) Give the eligibility criteria, and the sources and methods of selection of participants                                                                                                                                                                                                                                                                                                                   |
| Variables                    | 7 X     | Clearly define all outcomes, exposures, predictors, potential confounders, and effect modifiers. Give diagnostic criteria, if applicable                                                                                                                                                                                                                                                                      |
| Data sources/<br>measurement | 8* X    | For each variable of interest, give sources of data and details of methods of assessment (measurement). Describe comparability of assessment methods if there is more than one group                                                                                                                                                                                                                          |
| Bias                         | 9 X     | Describe any efforts to address potential sources of bias                                                                                                                                                                                                                                                                                                                                                     |
| Study size                   | 10 X    | Explain how the study size was arrived at                                                                                                                                                                                                                                                                                                                                                                     |
| Quantitative variables       | 11 X    | Explain how quantitative variables were handled in the analyses. If applicable, describe which groupings were chosen and why                                                                                                                                                                                                                                                                                  |
| Statistical methods          | 12 X    | (a) Describe all statistical methods, including those used to control for confounding<br>(b) Describe any methods used to examine subgroups and interactions<br>(c) Explain how missing data were addressed<br>(d) If applicable, describe analytical methods taking account of sampling strategy<br>(e) Describe any sensitivity analyses                                                                    |
| <b>Results</b>               |         |                                                                                                                                                                                                                                                                                                                                                                                                               |
| Participants                 | 13* X   | (a) Report numbers of individuals at each stage of study—eg numbers potentially eligible, examined for eligibility, confirmed eligible, included in the study, completing follow-up, and analysed<br>(b) Give reasons for non-participation at each stage<br>(c) Consider use of a flow diagram                                                                                                               |
| Descriptive data             | 14* X   | (a) Give characteristics of study participants (eg demographic, clinical, social) and information on exposures and potential confounders<br>(b) Indicate number of participants with missing data for each variable of interest                                                                                                                                                                               |
| Outcome data                 | 15* X   | Report numbers of outcome events or summary measures                                                                                                                                                                                                                                                                                                                                                          |
| Main results                 | 16 X    | (a) Give unadjusted estimates and, if applicable, confounder-adjusted estimates and their precision (eg, 95% confidence interval). Make clear which confounders were adjusted for and why they were included<br>(b) Report category boundaries when continuous variables were categorized<br>(c) If relevant, consider translating estimates of relative risk into absolute risk for a meaningful time period |
| Other analyses               | 17 X    | Report other analyses done—eg analyses of subgroups and interactions, and sensitivity analyses                                                                                                                                                                                                                                                                                                                |

1  
2  
3  
4  
5  
6  
7  
8  
9  
10  
11  
12  
13  
14  
15  
16  
17  
18  
19  
20  
21  
22  
23  
24  
25  
26  
27  
28  
29  
30  
31  
32  
33  
34  
35  
36  
37  
38  
39  
40  
41  
42  
43  
44  
45  
46  
47  
48  
49  
50  
51  
52  
53  
54  
55  
56  
57  
58  
59  
60

| <b>Discussion</b>        |      |                                                                                                                                                                            |
|--------------------------|------|----------------------------------------------------------------------------------------------------------------------------------------------------------------------------|
| Key results              | 18 X | Summarise key results with reference to study objectives                                                                                                                   |
| Limitations              | 19 X | Discuss limitations of the study, taking into account sources of potential bias or imprecision. Discuss both direction and magnitude of any potential bias                 |
| Interpretation           | 20 X | Give a cautious overall interpretation of results considering objectives, limitations, multiplicity of analyses, results from similar studies, and other relevant evidence |
| Generalisability         | 21 X | Discuss the generalisability (external validity) of the study results                                                                                                      |
| <b>Other information</b> |      |                                                                                                                                                                            |
| Funding                  | 22 X | Give the source of funding and the role of the funders for the present study and, if applicable, for the original study on which the present article is based              |

\*Give information separately for exposed and unexposed groups.

**Note:** An Explanation and Elaboration article discusses each checklist item and gives methodological background and published examples of transparent reporting. The STROBE checklist is best used in conjunction with this article (freely available on the Web sites of PLoS Medicine at <http://www.plosmedicine.org/>, Annals of Internal Medicine at <http://www.annals.org/>, and Epidemiology at <http://www.epidem.com/>). Information on the STROBE Initiative is available at [www.strobe-statement.org](http://www.strobe-statement.org).

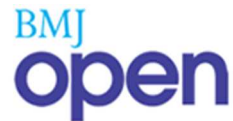

**A retrospective cross sectional study of risk factors and clinical spectrum of children admitted to hospital with pandemic H1N1 influenza as compared to influenza A**

|                                 |                                                                                                                                                                                                                                                                                                                                                                                                                                                                                                                                                                                                                                      |
|---------------------------------|--------------------------------------------------------------------------------------------------------------------------------------------------------------------------------------------------------------------------------------------------------------------------------------------------------------------------------------------------------------------------------------------------------------------------------------------------------------------------------------------------------------------------------------------------------------------------------------------------------------------------------------|
| Journal:                        | <i>BMJ Open</i>                                                                                                                                                                                                                                                                                                                                                                                                                                                                                                                                                                                                                      |
| Manuscript ID:                  | bmjopen-2011-000310.R1                                                                                                                                                                                                                                                                                                                                                                                                                                                                                                                                                                                                               |
| Article Type:                   | Research                                                                                                                                                                                                                                                                                                                                                                                                                                                                                                                                                                                                                             |
| Date Submitted by the Author:   | 06-Jan-2012                                                                                                                                                                                                                                                                                                                                                                                                                                                                                                                                                                                                                          |
| Complete List of Authors:       | Morris, Shaun; The Hospital for Sick Children, Infectious Diseases<br>Parkin, Patricia; The Hospital for Sick Children, Pediatric Medicine<br>Science, Michelle; The Hospital for Sick Children, Infectious Diseases<br>Subbarao, Padmaja; The Hospital for Sick Children, Respiratory Medicine<br>Yau, Yvonne; The Hospital for Sick Children, Microbiology<br>O'Riordan, Sean; Leeds General Infirmary, Pediatrics<br>Barton, Michelle; The Hospital for Sick Children, Infectious Diseases<br>Allen, Upton; The Hospital for Sick Children, Infectious Diseases<br>Tran, Dat; The Hospital for Sick Children, Infectious Diseases |
| <b>Primary Subject Heading</b>: | Paediatrics                                                                                                                                                                                                                                                                                                                                                                                                                                                                                                                                                                                                                          |
| Secondary Subject Heading:      | Infectious diseases, Respiratory medicine                                                                                                                                                                                                                                                                                                                                                                                                                                                                                                                                                                                            |
| Keywords:                       | Epidemiology < TROPICAL MEDICINE, H1N1, Influenza, Child                                                                                                                                                                                                                                                                                                                                                                                                                                                                                                                                                                             |
|                                 |                                                                                                                                                                                                                                                                                                                                                                                                                                                                                                                                                                                                                                      |

SCHOLARONE™  
Manuscripts

only

1  
2  
3  
4  
5  
6  
7  
8  
9  
10  
11  
12  
13  
14  
15  
16  
17  
18  
19  
20  
21  
22  
23  
24  
25  
26  
27  
28  
29  
30  
31  
32  
33  
34  
35  
36  
37  
38  
39  
40  
41  
42  
43  
44  
45  
46  
47  
48  
49  
50  
51  
52  
53  
54  
55  
56  
57  
58  
59  
60

**A retrospective cross sectional study of risk factors and clinical spectrum of children admitted to hospital with pandemic H1N1 influenza as compared to influenza A**

Shaun Morris<sup>1</sup>, MD, MPH, Patricia Parkin<sup>2</sup>, MD, Michelle Science<sup>1</sup>, MD, Padmaja Subbarao<sup>3</sup>, MD, MSc, Yvonne Yau<sup>4</sup>, MD, Sean O’Riordan<sup>5</sup>, MB, BChir, PhD, Michelle Barton<sup>1</sup>, MBBS, DM, Upton Allen<sup>1</sup>, MD, MSc, Dat Tran<sup>1</sup>, MD, MSc

**Abstract Word Count: 285**  
**Manuscript Word Count: 2927**

1. Division of Infectious Diseases, Department of Pediatrics, The Hospital for Sick Children, The University of Toronto. 555 University Avenue, Toronto, Ontario, Canada, M5G 1X8.
2. Division of Pediatric Medicine, Department of Pediatrics, The Hospital for Sick Children, The University of Toronto. 555 University Avenue, Toronto, Ontario, Canada, M5G 1X8.
3. Division of Respiratory Medicine, Department of Pediatrics, The Hospital for Sick Children, The University of Toronto. 555 University Avenue, Toronto, Ontario, Canada, M5G 1X8.
4. Division of Microbiology, Department of Pediatric Laboratory Medicine, The Hospital for Sick Children, The University of Toronto. 555 University Avenue, Toronto, Ontario, Canada, M5G 1X8.
5. Department of Paediatrics, Leeds General Infirmary, Great George Street, Leeds, United Kingdom, LS1 3EX

Keywords: Influenza, H1N1, Child, Epidemiology

Corresponding Author: Dr. Dat Tran, Division of Infectious Diseases, The Hospital for Sick Children, 555 University Avenue, Toronto, Ontario, Canada, M5G 1X8. Email: dat.tran@sickkids.ca. Telephone: (416) 813-6268.



## ABSTRACT

**Objective:** To compare risk factors for severe disease, admission to hospital and intensive care unit (ICU), and other clinical outcomes in children with pandemic H1N1 (pH1N1) versus those with seasonal influenza.

**Design:** Retrospective analysis of children admitted to hospital with pH1N1 versus seasonal influenza A.

**Setting:** Canadian tertiary referral children's hospital.

**Participants:** All laboratory identified cases of pH1N1 in children under the age of 18 years admitted to hospital in 2009 (n=176) and all seasonal influenza A cases admitted to hospital from influenza seasons 2004-05 to 2008-09 (n=200). Children with onset of symptoms more than 3 days after admission were excluded.

**Primary and secondary outcome measures:** Primary outcomes include admission to hospital and intensive care, need for mechanical ventilation. Secondary outcomes include length of stay in hospital and duration of supplemental oxygen requirement.

**Results:** Children admitted with pH1N1 were older than seasonal influenza A admissions (hospital admission: 6.5 vs 3.3 years,  $p<0.01$ ; ICU admission: 7.3 vs 3.6 years,  $p=0.02$ ). Children hospitalized with pH1N1 were more likely to have a pre-existing diagnosis of asthma (15% vs 5%,  $p<0.01$ ); however there was no difference in the severity of pre-existing asthma between the two groups. After controlling for obesity, asthma (OR 4.59, 95% CI 1.42-14.81) and age > 5 years (OR 2.87, 95% CI 1.60-5.16) were more common as risk factors in admitted children with pH1N1. Asthma was a significant predictor of the need for intensive care in pH1N1 (OR 4.56, 95% CI 1.16-17.89) but not seasonal influenza A patients.

1  
2  
3 **Conclusion:** While most pH1N1 cases presented with classic influenza-like symptoms,  
4  
5 risk factors for severe pH1N1 disease differed from seasonal influenza A. Older age and  
6  
7 asthma were associated with increased admission to hospital and ICU for children with  
8  
9  
10 pH1N1.  
11  
12  
13  
14  
15  
16  
17  
18  
19  
20  
21  
22  
23  
24  
25  
26  
27  
28  
29  
30  
31  
32  
33  
34  
35  
36  
37  
38  
39  
40  
41  
42  
43  
44  
45  
46  
47  
48  
49  
50  
51  
52  
53  
54  
55  
56  
57  
58  
59  
60

For peer review only

## ARTICLE SUMMARY

### Article focus

- Young age and underlying medical conditions have traditionally been considered risk factors for severe influenza in children.

- Children admitted with H1N1 influenza are more likely to have asthma, however, the impact of asthma severity is unknown.

### Key messages

- The presence of asthma and increased age, but not severity of asthma, were more common as risk factors for hospitalization with severe H1N1 influenza than with seasonal influenza A.

- These results suggest that in future pandemics, certain high-risk groups may be more adversely affected than expected with seasonal influenza.

- Treatment of H1N1 influenza with oseltamivir did not appear to be associated with differing outcomes or severity of disease.

### Strengths and limitations of this study

- The strength of this study is that it compares a large number of children admitted with microbiologically confirmed pH1N1 to those admitted over five years with seasonal influenza A. For each admitted child with suspected asthma, at least two physicians reviewed the case to confirm a diagnosis of pre-existing asthma and to grade the asthma as mild, moderate, or severe.

- The main limitations to this study include its retrospective design, single-center site, the inability to calculate population-based rates, and that the number of admitted patients with asthma, particularly to ICU, was small.

## INTRODUCTION

In a large global pooled analysis of patients of all ages, the risk factors for severe pandemic H1N1 (pH1N1) disease have been found to have some notable differences from seasonal influenza including younger age, obesity, and pregnancy.[1] In the pediatric population, infants and young children have traditionally been considered at risk for severe seasonal influenza A.[2-3] However, recently published pediatric studies suggest that while most cases of pH1N1 are relatively mild, older children, especially those suffering from asthma and obesity, may be at higher risk for severe disease. Rates of pediatric intensive care admission, mechanical ventilation, and mortality associated with pH1N1 may be higher than those associated with seasonal influenza.[4-7]

A previous study from our center following the first wave of the pandemic found that children admitted with pH1N1 were significantly older and more likely to have asthma than those admitted with seasonal influenza A.[8] In late 2009, a second wave of pH1N1 resulted in more admissions to our hospital. The increase in pH1N1 cases allowed us to verify the findings of our initial study, and identify independent risk factors for admission to the intensive care unit (ICU) among pH1N1 and seasonal influenza hospitalized cases through multivariable analyses. Finally, we wanted to understand how differences in diagnostic methods and treatment between pH1N1 and seasonal influenza might affect outcomes. Thus our primary goals in this study were to compare the ageadjusted proportions of asthmatics among children admitted to hospital and the ICU with pH1N1 relative to those admitted with seasonal influenza, and determine whether age and asthma are independent predictors of ICU admission in pH1N1 as well as

1  
2  
3 seasonal influenza infection. Secondary goals were to describe clinical features, other  
4 markers of illness severity, and effect of antiviral therapy and diagnostic methods on  
5  
6 outcomes in children with pH1N1.  
7  
8  
9

## 10 11 12 **DESIGN**

13  
14 We identified and reviewed health records of all laboratory-confirmed cases of  
15  
16 pH1N1 in children under the age of 18 years admitted in 2009 to The Hospital for Sick  
17  
18 Children (SickKids), a large pediatric referral hospital in Toronto, Canada with over  
19  
20 14,000 admissions per year.[9] Cases were identified through a review of microbiology  
21  
22 laboratory records. We compared children admitted with pH1N1 to those admitted with  
23  
24 seasonal influenza A during the 2004-2005 through 2008-2009 influenza seasons. In  
25  
26 order to exclude potential hospital-acquired infections, we excluded any children who  
27  
28 developed influenza-like symptoms on or after the third day of admission. Testing was  
29  
30 done at the clinical discretion of the attending physician. All patients with influenza-like  
31  
32 illness were initially screened for influenza by direct immunofluorescence assay (DFA).  
33  
34 During the first wave of the pandemic, all inpatient respiratory samples were tested using  
35  
36 reverse transcription polymerase chain reaction (RT-PCR) with primers developed by the  
37  
38 National Microbiology Laboratory, Winnipeg, Manitoba.[10] During the second wave,  
39  
40 all inpatient respiratory samples were tested with a commercial real-time RT-PCR kit  
41  
42 (RTPCR Kit 1.0, Astra Diagnostics, Hamburg). Seasonal influenza cases were identified  
43  
44 through DFA and/or viral culture. Two physicians (MB and DT) reviewed each potential  
45  
46 case of asthma to confirm the diagnosis and determine severity (Web Table). Any  
47  
48 discrepancies were adjudicated by an asthma specialist (PS).  
49  
50  
51  
52  
53  
54  
55  
56  
57  
58  
59  
60

1  
2  
3  
4  
5  
6 Comparisons were made between the pH1N1 and seasonal influenza A groups  
7  
8 and between the first and second waves of pH1N1. Differences in normally distributed  
9  
10 continuous variables were analyzed using Student's *t* test. Comparisons of skewed data  
11  
12 (length of stay and age) were analyzed using non parametric Mann-Whitney and  
13  
14 Kruskal-Wallis methods. The chi-square or Fisher's exact test was used to compare  
15  
16 categorical variables between groups and as a test of heterogeneity among multiple  
17  
18 proportions. We performed multivariable logistic regression to 1) adjust for the potential  
19  
20 confounding effect of age (as a continuous variable and categorical variable) on asthma  
21  
22 as a risk factor in comparing the severity of pH1N1 and seasonal influenza; and 2)  
23  
24 construct models of risk for ICU admission in pH1N1 and seasonal influenza A infection  
25  
26 that included age (as a continuous variable and categorical variable), asthma, and obesity  
27  
28 as independent variables. All statistical analysis was performed using Stata SE 10.[11]  
29  
30  
31  
32  
33  
34  
35

36 SM and DT conceived of and designed the study, conducted the analysis, interpreted the  
37  
38 data, and drafted the original manuscript. PP, MB, PS, SO, MB and UA contributed to  
39  
40 the analysis and interpretation of data. All authors critically revised the article for  
41  
42 important intellectual content and gave final approval of the version to be published. The  
43  
44 SickKids Research Ethics Board approved and waived individual informed consent for  
45  
46 this study.  
47  
48  
49  
50  
51  
52  
53  
54  
55  
56  
57  
58  
59  
60

## RESULTS

179 children with pH1N1 were admitted in 2009 in two waves (May to July 2009 n=58, September to December 2009 n=118) (Figure 1), of whom 3 were excluded because the onset of symptoms was more than three days after admission. 200 children were admitted to hospital with seasonal influenza A over five seasons (2004-2005 n=46; 2005-2006 n=26; 2006-2007 n=36; 2007-2008 n=56; 2008-2009 n=36). There were no differences across the years of seasonal influenza cases in terms of demographic characteristics, underlying risk factors, or outcomes (data not shown).

### Demographic Characteristics

Characteristics of children with pH1N1 and seasonal influenza are shown in Table 1. Children with pH1N1 were significantly older than those with seasonal influenza A (6.5 vs 3.3 years,  $p<0.01$ ). The proportion of children over 5 years was higher in pH1N1 (61% vs 38%,  $p<0.01$ ) whereas the proportion under 2 years was higher in seasonal influenza A (37% vs 18%,  $p<0.01$ ). Children admitted to ICU with pH1N1 were older than those with seasonal influenza A (7.3 vs 3.6 years,  $p=0.02$ ).

### Disease Severity

Requirement and duration of oxygen therapy, ICU admission, mechanical ventilation and total length of hospital stay are shown in Table 1. 59 (34%) patients admitted with pH1N1 required oxygen supplementation. 32 (18%) children with pH1N1 required admission to ICU and of these, 18 (56%) required mechanical ventilation. There was no difference in ICU admission or need for mechanical ventilation between pH1N1

1  
2  
3 and seasonal influenza A. More children admitted during the first wave required oxygen  
4  
5 than those admitted during the second wave (47% vs 28%,  $p=0.01$ ). When examining  
6  
7 only children who did not receive antiviral therapy, the difference in oxygen use between  
8  
9 waves 1 and 2 remained significant (48% vs 19%,  $p=0.03$ ). None of the pH1N1 patients  
10  
11 died.  
12  
13

### 14 15 16 17 18 **Clinical and Laboratory Characteristics**

19  
20 Most pH1N1 cases presented with fever and cough. More than one-third had  
21  
22 gastrointestinal symptoms (Table 2). The laboratory results of children admitted with  
23  
24 pH1N1 are shown in Table 3. Four patients had positive blood cultures during their  
25  
26 admission (*Streptococcus pneumoniae* (2), Viridans group *Streptococcus* (1),  
27  
28 *Pseudomonas aeruginosa* (1)).  
29  
30  
31  
32  
33

### 34 **Risk Factors**

35  
36 Children with pH1N1 compared to those with seasonal influenza were more likely  
37  
38 to have history of asthma (15% vs 5%,  $p<0.01$ ); however, there was no difference in the  
39  
40 severity of asthma between the two groups (Table 4). Cardiac disease (11% vs 4%,  
41  
42  $p=0.02$ ) and age under 2 years with no other risk factors (18% vs 9%,  $p=0.02$ ) were more  
43  
44 common in children hospitalized with seasonal influenza. In patients requiring intensive  
45  
46 care, history of asthma was more common in pH1N1 than in seasonal influenza A;  
47  
48 however, this difference did not reach statistical significance (19% vs 3%,  $p=0.10$ ).  
49  
50 In a multivariable analysis including obesity, age category, and asthma, both age  
51  
52 greater than 5 (with age  $\leq 2$  as reference) (OR 2.87 95% CI 1.60-5.16) and history of  
53  
54  
55  
56  
57  
58  
59  
60



1  
2  
3 asthma (OR 4.59, 95% CI 1.42-14.81) were more common as risk factors in admitted  
4  
5 children with pH1N1 compared to seasonal influenza A. In the same analysis but using  
6  
7 age as a continuous rather than categorical variable, asthma remained more common as a  
8  
9 risk factor in pH1N1 (OR 8.77, 95% CI 1.85-41.52). Table 5 displays multivariable  
10  
11 logistic regression analyses for predictors of ICU admission with pH1N1 and with  
12  
13 seasonal influenza A infection. In multivariable models including obesity, age category  
14  
15 and underlying asthma as independent variables, asthma was a significant predictor of the  
16  
17 need for intensive care with pH1N1 infection (OR 4.56, 95% CI 1.16-17.89) but not with  
18  
19 seasonal influenza A infection. When the multivariable models included age as a  
20  
21 continuous instead of categorical variable, underlying asthma remained a significant  
22  
23 predictor of the need for ICU care with pH1N1 infection (OR 5.22, 95% CI 1.23-22.08).  
24  
25 In children with asthma, 29% of those with pH1N1 versus 33% of those with  
26  
27 seasonal influenza presented with acute wheeze (p=0.81). In children without underlying  
28  
29 asthma, there was no difference in presentation with acute wheeze in those with pH1N1  
30  
31 (15%) and those with seasonal influenza (12%), p=0.51.  
32  
33  
34  
35  
36  
37  
38  
39  
40

### 41 **Diagnosis and Management**

42  
43 At our institution, seasonal influenza was diagnosed by DFA supplemented with  
44  
45 viral culture whereas cases positive by DFA for pH1N1 required confirmation by PCR.  
46  
47 To assess the potential impact of differing diagnostic methods, we re-analyzed all cases  
48  
49 restricting solely to those positive by DFA. The only changes from the previously  
50  
51 presented results were that the length of stay in hospital was longer in seasonal influenza  
52  
53 (median 3.5 vs 3 days, p=0.03) and that underlying chronic lung disease (excluding  
54  
55  
56  
57  
58  
59  
60

1  
2  
3 asthma) was no longer significantly more common in those admitted to ICU with  
4  
5 seasonal influenza A (p=0.09).  
6  
7

8  
9  
10 Children with pH1N1 were more likely to receive antiviral therapy (61% vs 8%,  
11  
12 p<0.01). There were significant changes in how pH1N1 was managed between waves;  
13  
14 19% of children received antiviral therapy during wave 1 compared to 82% in wave 2 (p  
15  
16 < 0.01). However, when comparing all children with pH1N1 who received antiviral  
17  
18 therapy to those who did not, there were no significant differences in the need for ICU  
19  
20 admission (22% vs 14%, p=0.07), mechanical ventilation (14% vs 8%, p=0.08), or length  
21  
22 of stay in hospital (median duration 3 days vs 3 days, p=0.68). To test if sicker children  
23  
24 received antiviral therapy, we compared all available Canadian Triage and Acuity  
25  
26 Scores[12] (CTAS), a standardized measure of disease acuity, between pH1N1 patients  
27  
28 who did (n=65), and did not (n=42) receive antiviral therapy and did not find a significant  
29  
30 difference between the two groups (p=0.70).  
31  
32  
33  
34  
35  
36  
37  
38

## 39 **DISCUSSION**

40  
41 Most cases of pH1N1 presented with a classic influenza-like illness, with no  
42  
43 convincing evidence that pH1N1 was more severe than seasonal influenza. However, the  
44  
45 risk factors for admission to hospital and ICU differed between pH1N1 and seasonal  
46  
47 influenza. Older age was a greater risk factor for admission to hospital and ICU for  
48  
49 pH1N1 and asthma was a greater risk factor for hospitalization for pH1N1. These results  
50  
51 corroborate earlier research based on fewer cases from our institution[8] as well as a  
52  
53 recent study from Colorado comparing children admitted to hospital with pH1N1 to those  
54  
55  
56  
57  
58  
59  
60

1  
2  
3 with 2008-09 seasonal influenza A or B.[13] Conversely, underlying cardiac disease in  
4 those admitted to hospital and non-asthma chronic lung disease in those admitted to ICU  
5  
6 were significantly more common in seasonal influenza. These results suggest that risk  
7  
8 factors for new influenza strains and that high-risk groups during future pandemics may  
9  
10 not be simply extrapolated from the experience with seasonal strains.  
11  
12

13  
14 Guidelines from the Public Health Agency of Canada highlighted children less  
15  
16 than 2 years of age as a high-risk group for pH1N1.[14] However, our results of a median  
17  
18 age of 6.5 years in hospitalized pH1N1 patients is remarkably similar to studies from  
19  
20 California[15] (median age 6 years) and Japan[16] (median age 7 years). While we found  
21  
22 the proportion of hospitalized cases higher in older age categories in pH1N1, in the  
23  
24 absence of community population-based epidemiologic data, we are not able to comment  
25  
26 on any differences that may exist in age-specific attack, hospitalization, or ICU admission  
27  
28 rates in our study population.  
29  
30  
31  
32  
33

34  
35  
36 This study was not designed to identify the impact of differing management  
37  
38 strategies on severity and outcomes of pH1N1. However, in contrast to the first study  
39  
40 from our centre, in this study, differences in antiviral use between waves allowed for an  
41  
42 interesting natural experiment. Overall, during the first wave, 0%, 46%, and 14% of  
43  
44 children aged under 2 years, 2 to 4 years, and 5 years and over respectively received  
45  
46 oseltamivir. During the second wave, 65%, 88%, and 86% of children under 2 years, 2 to  
47  
48 4 years, and 5 years and over respectively received antiviral therapy. While there was no  
49  
50 difference in markers of disease severity including ICU admission, mechanical  
51  
52 ventilation, and length of hospital stay between the two pandemic waves, there was a  
53  
54  
55  
56  
57  
58  
59  
60

1  
2  
3 greater need for oxygen in children hospitalized during wave 1. This difference only  
4  
5 remained significant when restricting the analysis to those who did not receive antiviral  
6  
7 therapy. This finding may reflect increased antiviral use directed at sicker children during  
8  
9 wave 2, while the mildest cases did not receive antivirals.  
10  
11

12  
13  
14  
15 In the previous analysis of the first wave of pH1N1 in Toronto, asthma was a  
16  
17 more significant risk factor for pH1N1 than for seasonal influenza.[8] In this study, with  
18  
19 more than 3 times the number of pH1N1 cases, we confirm the significance of asthma as  
20  
21 a major risk factor; controlling for obesity and age (as a continuous variable) asthma was  
22  
23 more likely to be present in hospitalized children with pH1N1 (OR 4.59, 95% CI 1.42-  
24  
25 14.81 than with seasonal influenza A. In pH1N1 cases, asthma was associated with  
26  
27 admission to ICU (OR 4.56, 95% CI 1.16-17.89). This is in contrast to seasonal influenza  
28  
29 A in which underlying asthma was not significantly associated with ICU admission (OR  
30  
31 2.47, 95% CI 0.24-25.80). We did not find that the severity of asthma was differentially  
32  
33 associated with hospitalization or ICU admission between pH1N1 and seasonal influenza.  
34  
35 While 6 (19%) ICU admissions with pH1N1 had asthma (4 mild, 1 moderate, and 1  
36  
37 severe) compared to only 1 (3%) (mild) ICU admission with seasonal influenza, the  
38  
39 numbers were too small to be able to demonstrate a difference. In a large California study  
40  
41 of 345 children hospitalized or who died with pH1N1, 31% of hospitalized children and  
42  
43 34% of ICU and/or fatal cases had asthma.[15] In Japan, 14% of non-severe cases of  
44  
45 pH1N1 and 47% of severe cases had asthma,[16] while a United Kingdom study found  
46  
47 asthma was present in 16% of children <16 years and 31% of adults.[17] None of these  
48  
49 studies examined severity of asthma or the differences between pH1N1 and seasonal  
50  
51  
52  
53  
54  
55  
56  
57  
58  
59  
60

1  
2  
3 influenza.  
4  
5  
6  
7

8 Immunologic studies of severe pH1N1 cases have shown delayed expression of  
9  
10 genes involved in the adaptive immune response, delayed viral clearance, and increased  
11  
12 levels of innate immunity mediators involved in the Th1 and Th17 response.[18-19]  
13  
14 Children with underlying asthma and other groups (such as pregnant women) thought to  
15  
16 be at higher risk for severe pH1N1 disease[20-22] may have an altered immunologic and  
17  
18 inflammatory response to this virus resulting in increased disease severity. Interleukin-5  
19  
20 (IL-5) has been shown to be highly expressed in bronchial mucosa of asthmatics,[23] is a  
21  
22 key player in eosinophilic inflammation,[24] and has been found to be higher in serum of  
23  
24 pH1N1 patients with pneumonia than those without.[25] However, further research is  
25  
26 needed to fully understand this association. While there is some evidence in adults that  
27  
28 adjuvant corticosteroids in severe pH1N1 may increase mortality,[26] the impact of  
29  
30 inhaled corticosteroids in childhood asthma on pH1N1 severity is not known and this  
31  
32 study was not designed nor powered to address this question.  
33  
34  
35  
36  
37  
38  
39  
40

41 Influenza vaccination coverage in asthmatic children has been poor in many  
42  
43 countries.[27,28] Some physicians remain skeptical of the need for vaccinating all  
44  
45 asthmatic children [29], while others tend to prioritize children with more severe  
46  
47 asthma.[30] Definitive data has been elusive [31]. Our findings suggest that physicians  
48  
49 should ensure all asthmatic children under their care have been vaccinated against pH1N1  
50  
51 (which is currently included in the standard seasonal influenza vaccine), regardless of  
52  
53 severity of asthma, at least until randomized controlled trial data becomes available.  
54  
55  
56  
57  
58  
59  
60

1  
2  
3  
4  
5  
6 There are several limitations to this study including its retrospective design,  
7  
8 single-center site, and inability to calculate population-based rates. The number of  
9  
10 admitted patients with asthma, particularly to ICU, was small, and this may have  
11  
12 hindered our ability to identify differences in risk based on severity. Additionally, we  
13  
14 identified only the single most important underlying risk factor (with the exception of  
15  
16 asthma, obesity, and age which were all collected for each patient) and thus, we were  
17  
18 unable to explore interactions between risk factors in patients with multiple co-  
19  
20 morbidities. Our metrics of influenza severity–ICU admission and duration of stay–may  
21  
22 be impacted by non-medical factors such as bed availability. In regards to oxygen use, we  
23  
24 did not have data on oximetry or criteria that were used by physicians to start or stop  
25  
26 oxygen supplementation and thus it was difficult to determine the significance of the  
27  
28 difference seen in wave 1 versus wave 2. In regards to oseltamivir use, we did not extract  
29  
30 data on dosage, duration, or when the medication was begun. However, the use of  
31  
32 oseltamivir in this study was at the discretion of the attending physician and thus  
33  
34 reflective of ‘real life’ use. It is possible that we did not identify all patients at our  
35  
36 hospital with influenza (seasonal or pH1N1) due to false negative testing or testing being  
37  
38 performed at an outside hospital and not repeated at our institution; however, we expect  
39  
40 both of these cases to be very rare.  
41  
42  
43  
44  
45  
46  
47  
48  
49

## 50 CONCLUSION

51  
52 Risk factors for severe disease, specifically the presence of underlying asthma  
53  
54 and increased age, differed between pH1N1 and seasonal influenza in children. There  
55  
56  
57  
58  
59  
60

1  
2  
3 was no difference in overall disease severity. These results suggest that in future  
4  
5 pandemics with new influenza strains, high-risk groups may be different than those  
6  
7 traditionally considered as such. The reasons for the differing influence of asthma and  
8  
9 age on host response to pH1N1 are not understood and further study of the underlying  
10  
11 mechanisms contributing to these differences may shed new light on the host-pathogen  
12  
13 immunobiology of a pandemic strain of influenza virus. This study emphasizes the need  
14  
15 to ensure that all asthmatic children have been vaccinated against pH1N1 influenza,  
16  
17  
18 regardless of the severity of their asthma.  
19  
20  
21  
22  
23  
24  
25  
26  
27  
28  
29  
30  
31  
32  
33  
34  
35  
36  
37  
38  
39  
40  
41  
42  
43  
44  
45  
46  
47  
48  
49  
50  
51  
52  
53  
54  
55  
56  
57  
58  
59  
60

| Characteristic                      | pH1N1 Wave 1 versus Wave 2 |                         |                 | pH1N1 versus Seasonal Influenza |                      |                 |
|-------------------------------------|----------------------------|-------------------------|-----------------|---------------------------------|----------------------|-----------------|
|                                     | pH1N1 1st Wave<br>n=58     | pH1N1 2nd Wave<br>n=118 | p value         | pH1N1 Total<br>n=176            | Seasonal<br>n=200    | p value         |
| Sex, male, no. (%)                  | 35 (60)                    | 72 (61)                 | 0.93            | 107 (61)                        | 108 (54)             | 0.18            |
| Age, yr, median (IQR)               | 6.4 (3.4-10.1)             | 6.5 (2.9-11.4)          | 0.81            | <b>6.5 (3.0-10.6)</b>           | <b>3.3 (1.4-7.8)</b> | <b>&lt;0.01</b> |
| Age group, yr, no (%)               |                            |                         |                 |                                 |                      |                 |
| <2                                  | 8 (14)                     | 23 (19)                 | 0.35            | <b>31(18)</b>                   | <b>74(37)</b>        | <b>&lt;0.01</b> |
| 2 to 5                              | 13 (22)                    | 24 (20)                 | 0.75            | 37(21)                          | 54(27)               | 0.18            |
| >5                                  | 37 (64)                    | 71 (60)                 | 0.64            | <b>108(61)</b>                  | <b>72(36)</b>        | <b>&lt;0.01</b> |
| Admitted to ICU                     |                            |                         |                 |                                 |                      |                 |
| No. (%) of children                 | 12 (21)                    | 20 (17)                 | 0.36            | 32 (18)                         | 31 (15)              | 0.49            |
| Age, yr, median (IQR)               | 5.8 (3.2-7.3)              | 9.2 (5.4-11.4)          | 0.13            | <b>7.3 (4.0-10.6)</b>           | <b>3.6 (1.5-9.7)</b> | <b>0.02</b>     |
| Required Mechanical Ventilation     |                            |                         |                 |                                 |                      |                 |
| No. (%) of children                 | 7 (12)                     | 11 (9)                  | 0.57            | 18 (10)                         | 19 (10)              | 0.81            |
| No. (%) of children admitted to ICU | 7 (58)                     | 11 (55)                 | 0.85            | 18 (56)                         | 19 (61)              | 0.69            |
| Required Supplemental Oxygen        |                            |                         |                 |                                 |                      |                 |
| No. (%) of children                 | 26 (47)                    | 33 (28)                 | 0.013           | 59 (34)                         | n/a                  | n/a             |
| Duration of Oxygen, d, median (IQR) | 4 (2-6)                    | 3(2-7)                  | 0.73            | 3 (2-6)                         | n/a                  | n/a             |
| Length of stay, d, median (IQR)     |                            |                         |                 |                                 |                      |                 |
| In hospital                         | 4 (2-6)                    | 3 (2-5)                 | 0.06            | 3 (2-5)                         | 4 (2-7)              | 0.12            |
| In ICU                              | 3.5 (2.5-17)               | 2 (1.5-5)               | 0.08            | 3 (2-8)                         | 2 (1-5)              | 0.24            |
| Anti-viral therapy No. (%)          | <b>11 (19)</b>             | <b>97 (82)</b>          | <b>&lt;0.01</b> | <b>108 (61)</b>                 | <b>16 (8)</b>        | <b>&lt;0.01</b> |

Table 1: Demographic and clinical characteristics of pH1N1 and seasonal influenza



|                  | pH1N1 Symptoms |             |         |             | Seasonal Influenza Symptoms |             |         |             |
|------------------|----------------|-------------|---------|-------------|-----------------------------|-------------|---------|-------------|
|                  | 0 to <2 yrs    | 2 to <5 yrs | >5 yrs  | 0 to 18 yrs | 0 to <2 yrs                 | 2 to <5 yrs | >5 yrs  | 0 to 18 yrs |
| Fever            | 31 (100)       | 36 (97)     | 99 (92) | 166 (94)    | 64 (86)                     | 45 (83)     | 59 (82) | 168 (84)    |
| Cough            | 29 (94)        | 34 (92)     | 84 (78) | 147 (84)    | 34 (46)                     | 29 (54)     | 39 (54) | 102 (51)    |
| Gastrointestinal | 14 (45)        | 16 (43)     | 40 (37) | 70 (40)     | 13 (15)                     | 14 (26)     | 6 (8)   | 33 (16)     |
| Wheeze           | 4 (13)         | 8 (22)      | 24 (22) | 36 (20)     | 11 (15)                     | 5 (9)       | 14 (19) | 30 (15)     |
| Pneumonia        | 11 (35)        | 12 (32)     | 29 (27) | 52 (30)     | 9 (12)                      | 8 (15)      | 19 (26) | 36 (18)     |
| Apnea            | 3 (10)         | 3 (8)       | 2 (2)   | 8 (5)       | 0 (0)                       | 0 (0)       | 0 (0)   | 0 (0)       |
| Seizure          | 2 (7)          | 5 (14)      | 2 (2)   | 9 (5)       | 8 (11)                      | 6 (11)      | 4 (6)   | 18 (9)      |
| Encephalopathy   | 1 (3)          | 1 (3)       | 2 (2)   | 4 (2)       | 0 (0)                       | 0 (0)       | 1 (14)  | 1 (0.5)     |
| Myocarditis      | 0 (0)          | 1 (3)       | 1 (1)   | 2 (1)       | 0 (0)                       | 0 (0)       | 0 (0)   | 0 (0)       |
| Myositis         | 0 (0)          | 0 (0)       | 2 (2)   | 2 (1)       | 0 (0)                       | 1 (2)       | 0 (0)   | 1 (0.5)     |

Table 2: Clinical characteristics of pH1N1 and seasonal influenza by age category

| Lab Value                                   | pH1N1 influenza<br>Number (%) | Seasonal influneza<br>Number (%) |
|---------------------------------------------|-------------------------------|----------------------------------|
| White blood cells $\geq 11.0 \times 10^9/L$ | 50 (29)                       | 60 (31)                          |
| White blood cells $< 4.0 \times 10^9/L$     | 33 (19%)                      | 34 (17)                          |
| Absolute neutrophils $>6.6 \times 10^9/L$   | 59 (35)                       | 60 (31)                          |
| Absolute neutrophils $<1.5 \times 10^9/L$   | 30 (18)                       | 36 (19)                          |
| Absolute lymphocytes $< 1.8 \times 10^9/L$  | 112 (66)                      | 102 (53)                         |

Table 3: Haematologic laboratory values for children admitted with pH1N1 and seasonal influenza.

Footnote: For pH1N1 influenza, 174 children had complete blood count and 170 had differential performed. For seasonal influenza, 196 children had complete blood count and 193 had differential performed.

| Risk Factor                      | All Children Admitted to Hospital |                   |                 | Children Admitted to PICU |                  |             |
|----------------------------------|-----------------------------------|-------------------|-----------------|---------------------------|------------------|-------------|
|                                  | pH1N1<br>n=176                    | Seasonal<br>n=200 | p value         | pH1N1<br>n=32             | Seasonal<br>n=31 | p value*    |
| Asthma                           | <b>26 (15)#</b>                   | <b>9 (5)</b>      | <b>&lt;0.01</b> | 6 (19)                    | 1 (3)            | 0.10        |
| Mild Asthma                      | 16(62)                            | 7(78)             | 0.38            | 4(67)                     | 1(100)           | 1.00        |
| Moderate Asthma                  | 6(23)                             | 1(11)             | 0.44            | 1 (17)                    | 0(0)             | 1.00        |
| Severe Asthma                    | 4 (15)                            | 1(11)             | 0.75            | 1(17)                     | 0(0)             | 1.00        |
| Chronic Lung Disease             | 12 (7)                            | 13 (7)            | 0.92            | <b>0 (0)</b>              | <b>5 (16)</b>    | <b>0.02</b> |
| Obesity#                         | 8(7)                              | 14(9)             | 0.64            | 3 (20)                    | 2 (9)            | 0.38        |
| Cardiac Disease                  | <b>7 (4)</b>                      | <b>21 (11)</b>    | <b>0.02</b>     | 3 (9)                     | 4 (12)           | 0.71        |
| Hemoglobinopathy                 | 19 (11)                           | 22 (11)           | 0.95            | 1 (3)                     | 1 (3)            | 0.75        |
| Immunodeficiency                 | 32 (18)                           | 42 (21)           | 0.49            | 1 (3)                     | 2 (3)            | 0.61        |
| Neurologic Impairment            | 21 (12)                           | 26 (13)           | 0.76            | 6 (19)                    | 8 (26)           | 0.56        |
| Age <2 and no other risk factors | <b>16 (9)</b>                     | <b>35 (18)</b>    | <b>0.02</b>     | 2 (6)                     | 4 (13)           | 0.43        |

Table 4<sup>^</sup>: Risk factors for admission to hospital and intensive care unit, pandemic H1N1 versus seasonal influenza A

Footnotes: # Percentages in parentheses. \*Fisher's exact test used when cell size is small. †Obesity was defined according to guidelines from the Centers for Disease Control as a body mass index  $\geq 95^{\text{th}}$  percentile for age in children older than 2 years.[32] Obesity could not be calculated for 45(31%) & 68(54%) children > 2 years in the seasonal and pH1N1 groups respectively. ^ Any differences between the numbers presented in Table 4 and those from O'Riordan et al. [8] are the result of a re-assessment of all pH1N1 and seasonal influenza cases for this study.

1  
2  
3  
4  
5  
6  
7  
8  
9  
10  
11  
12  
13  
14  
15  
16  
17  
18  
19  
20  
21  
22  
23  
24  
25  
26  
27  
28  
29  
30  
31  
32  
33  
34  
35  
36  
37  
38  
39  
40  
41  
42  
43  
44  
45  
46  
47  
48  
49

| Risk Factor           | pH1N1 |        |        | Seasonal Influenza |        |        |
|-----------------------|-------|--------|--------|--------------------|--------|--------|
|                       | OR    | L95%CI | U95%CI | OR                 | L95%CI | U95%CI |
| Asthma                | 4.56  | 1.16   | 17.89  | 2.47               | 0.24   | 25.80  |
| Obesity               | 4.18  | 0.76   | 22.95  | 1.06               | 0.20   | 5.64   |
| Age 0 to <2<br>Years  | 1.00  |        |        | 1.00               |        |        |
| Age 2 to < 5<br>Years | 1.70  | 0.30   | 9.48   | 1.40               | 0.44   | 4.44   |
| Age >5 Years          | 0.89  | 0.19   | 4.07   | 0.62               | 0.19   | 1.98   |

Table 5: Multivariable regression of asthma, obesity, and age category as risk factors for ICU admission with pH1N1 and seasonal influenza A.

Footnote: ^ Asthma was also common as a risk factor (OR 8.77, 95% CI 1.85-41.52) for admission to hospital in pH1N1 compared to seasonal influenza (with age as continuous variable). Unadjusted (univariate) OR's for pH1N1: asthma (OR 1.43, 95% CI 0.52-3.91), obesity (OR 3.25, 95% CI 0.81-19.69), age 0 to <2 (OR 1.00), age 2 to <5 (OR 2.18, 95% CI 0.51-9.26), age >5 (OR 2.39, 0.66-8.58). Unadjusted (univariate) OR's for seasonal influenza: asthma (OR 0.67, 95% CI 0.08-5.56), obesity (OR 1.14, 95% CI 0.22-5.99), age 0 to <2 (OR 1.00), age 2 to <5 (OR 1.30, 95% CI 0.51-3.32), age >5 (OR 0.92, 95% CI 0.36-2.33).

## References

- 1 Van Kerkhove MD, Vandemaele KAH, Shinde V, et al. Risk factors for severe outcomes following 2009 influenza A (H1N1) infection: A global pooled analysis. *PLoS Med* 2011;**8**(7):e1001053.
- 2 Iskander M, Booy R, Lambert S. The burden of influenza in children. *Curr Opin Infect Dis* 2007;**20**(3):259-263.
- 3 Pickering LK, Baker CJ, Overturth GD, et al editors. Red Book 2009 Report of the Committee on Infectious Diseases. 28th ed. Elk Grove Village, IL: American Academy of Pediatrics; 2009.
- 4 Libster R, Bugna J, Coviello S, et al. Pediatric hospitalizations associated with 2009 pandemic influenza A (H1N1) in Argentina. *N Engl J Med* 2010;**362**(1):45-55.
- 5 Plessa E, Diakakis P, Gardelis J, et al. Clinical Features, Risk Factors, and Complications Among Pediatric Patients With Pandemic Influenza A (H1N1). *Clin Pediatr (Phila)* 2010;**49**(8):777-781.
- 6 Kumar S, Havens PL, Chusid MJ, et al. Clinical and epidemiologic characteristics of children hospitalized with 2009 pandemic H1N1 influenza A infection. *Pediatr Infect Dis J* 2010;**29**(7):591-594.
- 7 Engelhard D, Bromberg M, Averbuch D, et al. Increased extent of and risk factors for pandemic (H1N1) 2009 and seasonal influenza among children, Israel. *Emerg Infect Dis* 2011;**17**(9):1740-1743.
- 8 O'Riordan S, Barton M, Yau Y, et al. Risk factors and outcomes among children admitted to hospital with pandemic H1N1 influenza. *CMAJ* 2010;**182**(1):39-44.
- 9 The Hospital for Sick Children. The Year in Review 2009-2010. The Annual Report of

1  
2  
3 The Hospital for Sick Children. Toronto, Ontario: The Hospital for Sick Children 2010.

4  
5 10 Cutler J, Schleihau E, Hatchette TF, et al. Investigation of the first cases of human-  
6  
7  
8 tohuman

9  
10 infection with the new swine-origin influenza A (H1N1) virus in Canada. *CMAJ*  
11  
12 2009;**181**(3-4):159-163.

13  
14 11 StataCorp. Stata statistical software: Release 10. 2007.

15  
16  
17 12 Warren DW, Jarvis A, LeBlanc L, et al. Revisions to the Canadian Triage and Acuity  
18  
19 Scale paediatric guidelines (PaedCTAS). *CJEM* 2008;**10**(3):224-243.

20  
21 13 Bagdure D, Curtis DJ, Dobyens E, et al. Hospitalized children with 2009 pandemic  
22  
23 influenza A (H1N1): comparison to seasonal influenza and risk factors for admission to  
24  
25 the ICU. *PLoS One* 2010; **5**(12):e15173.

26  
27 14 Public Health Agency of Canada. Clinical recommendations for patients presenting  
28  
29 with respiratory symptoms during the 2009–2010 influenza season. 2010; Available at:  
30  
31 [http://www.phac-aspc.gc.ca/alert-alerte/h1n1/pdf/H1N1\\_DecisionTree\\_oct23\\_e.pdf](http://www.phac-aspc.gc.ca/alert-alerte/h1n1/pdf/H1N1_DecisionTree_oct23_e.pdf).

32  
33 Accessed December 3, 2010.

34  
35 15 Louie JK, Gavali S, Acosta M, et al. Children Hospitalized With 2009 Novel  
36  
37 Influenza A(H1N1) in California. *Arch Pediatr Adolesc Med* 2010;**164**(11):1023-1031.

38  
39 16 Okada T, Morozumi M, Matsubara K, et al. Characteristic findings of pediatric  
40  
41 inpatients with pandemic (H1N1) 2009 virus infection among severe and nonsevere  
42  
43 illnesses. *J Infect Chemother* 2011;**17**(2):238-245.

44  
45 17 Nguyen-Van-Tam JS, Openshaw PJ, Hashim A, et al. Risk factors for hospitalisation  
46  
47 and poor outcome with pandemic A/H1N1 influenza: United Kingdom first wave (May-  
48  
49 September 2009). *Thorax* 2010;**65**(7):645-651.

- 1  
2  
3 18 Bermejo-Martin JF, Martin-Loeches I, Rello J, et al. Host adaptive immunity  
4 deficiency in severe pandemic influenza. *Crit Care* 2010;**14**(5):R167.  
5  
6  
7  
8 19 Bermejo-Martin JF, Ortiz de Lejarazu R, Pumarola T, et al. Th1 and Th17  
9 hypercytokinemia as early host response signature in severe pandemic influenza. *Crit*  
10 *Care* 2009;**13**(6):R201.  
11  
12  
13  
14 20 Louie JK, Acosta M, Jamieson DJ, et al. Severe 2009 H1N1 influenza in pregnant and  
15 postpartum women in California. *N Engl J Med* 2010;**362**(1):27-35.  
16  
17  
18  
19 21 Creanga AA, Johnson TF, Graitcer SB, et al. Severity of 2009 pandemic influenza A  
20 (H1N1) virus infection in pregnant women. *Obstet Gynecol* 2010;**115**(4):717-726.  
21  
22  
23  
24 22 Siston AM, Rasmussen SA, Honein MA, et al. Pandemic 2009 influenza A(H1N1)  
25 virus illness among pregnant women in the United States. *JAMA* 2010; **303**(15):1517-  
26  
27  
28  
29 1525.  
30  
31  
32 23 Kotsimbos AT, Hamid Q. IL-5 and IL-5 receptor in asthma. *Mem Inst Oswaldo Cruz*  
33  
34  
35 1997;**92** Suppl 2:75-91.  
36  
37 24 Wang J, Young IG. Eosinophilic inflammation: mechanisms regulating IL-5  
38 transcription in human T lymphocytes. *Allergy* 2007;**62**(10):1131-1138.  
39  
40  
41 25 Takano T, Tajiri H, Kashiwagi Y, Kimura S, Kawashima H. Cytokine and chemokine  
42 response in children with the 2009 pandemic influenza A (H1N1) virus infection. *Eur J*  
43 *Clin Microbiol Infect Dis* 2011;**30**(1):117-120.  
44  
45  
46  
47 26 Kim SH, Hong SB, Yun SC, et al. Corticosteroid treatment in critically ill patients  
48 with pandemic influenza A/H1N1 2009 infection: analytic strategy using propensity  
49 scores. *Am J Respir Crit Care Med* 2011;183(9):1207-14.  
50  
51  
52  
53 27 Centers for Disease Control and Prevention (CDC) *MMWR Morb Mortal Wkly Rep*.  
54  
55  
56  
57  
58  
59  
60

1  
2  
3 2007;56(9):193-6.  
4

5 28 Low influenza vaccination coverage in asthmatic children in France in 2006-7. *Euro*  
6  
7

8 *Surveill.* 2008;13(43):pii:19016  
9

10 29 Bueving HJ. Is influenza vaccination in asthmatic children helpful? *Clin Exp Allergy.*  
11

12 2006;36(1):21-5.  
13

14 30 Dombkowski KJ, Leung SW, Clark SJ. Physician perspectives regarding annual  
15

16 influenza vaccination among children with asthma. *Ambul Pediatr.* 2008;8(5):294-9.  
17

18 31 Cates CJ, Jefferson TO, Rowe BH. Vaccines for preventing influenza in people with  
19

20 asthma. *Cochrane Database Syst Rev.* 2008;(2):CD000364  
21  
22

23 32 Centers for Disease Control (CDC). Defining Childhood Overweight and Obesity.  
24

25 2010; Available at: <http://www.cdc.gov/obesity/defining.html>. Accessed October 1, 2011.  
26  
27  
28  
29  
30  
31  
32  
33  
34  
35  
36  
37  
38  
39  
40  
41  
42  
43  
44  
45  
46  
47  
48  
49  
50  
51  
52  
53  
54  
55  
56  
57  
58  
59  
60



~~A retrospective cross sectional study of risk factors and clinical spectrum of children admitted to hospital with pandemic H1N1 influenza~~  
A retrospective cross sectional study of risk factors and clinical spectrum of children admitted to hospital with pandemic H1N1 influenza as compared to influenza A

Shaun Morris<sup>1</sup>, MD, MPH, Patricia Parkin<sup>2</sup>, MD, Michelle ~~Bridge~~Science<sup>1</sup>, MD, Padmaja Subbarao<sup>3</sup>, MD, MSc, Yvonne Yau<sup>4</sup>, MD, Sean O'Riordan<sup>5</sup>, MB, BChir, PhD, Michelle Barton<sup>1</sup>, MBBS, DM, Upton Allen<sup>1</sup>, MD, MSc, Dat Tran<sup>1</sup>, MD, MSc

Abstract Word Count: ~~2872~~287

Manuscript Word Count: 2830

Comment [DT1]: Double check: I got 2929

1. Division of Infectious Diseases, Department of Pediatrics, The Hospital for Sick Children, The University of Toronto. 555 University Avenue, Toronto, Ontario, Canada, M5G 1X8.
2. Division of Pediatric Medicine, Department of Pediatrics, The Hospital for Sick Children, The University of Toronto. 555 University Avenue, Toronto, Ontario, Canada, M5G 1X8.
3. Division of Respiratory Medicine, Department of Pediatrics, The Hospital for Sick Children, The University of Toronto. 555 University Avenue, Toronto, Ontario, Canada, M5G 1X8.
4. Division of Microbiology, Department of Pediatric Laboratory Medicine, The Hospital for Sick Children, The University of Toronto. 555 University Avenue, Toronto, Ontario, Canada, M5G 1X8.
5. Department of Paediatrics, Leeds General Infirmary, Great George Street, Leeds, United Kingdom, LS1 3EX

Keywords: Influenza, H1N1, Child, Epidemiology

Corresponding Author: Dr. Dat Tran, Division of Infectious Diseases, The Hospital for Sick Children, 555 University Avenue, Toronto, Ontario, Canada, M5G 1X8. Email: dat.tran@sickkids.ca. Telephone: (416) 813-6268.

**ABSTRACT**

**Objective:** To compare risk factors for severe disease admission to hospital and intensive care unit (ICU) and clinical outcomes in children with pandemic H1N1 (pH1N1) versus those with seasonal influenza.

**Design:** Retrospective analysis of children admitted to hospital with pH1N1 versus seasonal influenza A.

**Setting:** Canadian tertiary referral children's hospital.

**Participants:** All laboratory identified cases of pH1N1 in children under the age of 18 years admitted to hospital in 2009 (n=176) and all seasonal influenza cases admitted to hospital from influenza seasons 2004-05 to 2008-09 (n=200). Children with onset of symptoms more than 3 days after admission were excluded.

**Primary and secondary outcome measures:** Primary outcomes include admission to hospital and intensive care, need for mechanical ventilation, and presence of specific risk factors including age, asthma, and obesity. Secondary outcomes include length of stay in hospital, duration of supplemental oxygen requirement, and other demographic and clinical characteristics.

**Results:** Children admitted with pH1N1 were older than seasonal influenza A admissions (hospital admission: 6.5 vs 3.3 years,  $p<0.01$ ; ICU admission: 7.3 vs 3.6 years,  $p=0.02$ ). Children hospitalized pH1N1 were more likely to have a pre-existing diagnosis of asthma (15% vs 5%,  $p<0.01$ ); however there was no difference in the severity of pre-existing asthma between the two groups. After controlling for obesity, asthma (OR 4.59, 95% CI 1.42-14.81) and age  $>5$  years (OR 2.87, 95% CI 1.60-5.16) were more common as risk

1  
2  
3  
4  
5  
6  
7  
8 factors in admitted children with pH1N1. Asthma was a significant predictor of the need  
9 for intensive care in pH1N1 (OR 4.56, 95% CI 1.16–17.89) but not seasonal influenza A  
10 patients.  
11

12  
13 **Conclusion:** While most pH1N1 cases presented with classic influenza like symptoms,  
14 risk factors for severe pH1N1 disease differed from seasonal influenza A. Older age and  
15 asthma were associated with increased admission to hospital and ICU for children with  
16 pH1N1.  
17

18  
19 **Objective:** To compare risk factors for severe disease, admission to hospital and  
20 intensive care unit (ICU), and other clinical outcomes in children with pandemic H1N1  
21 (pH1N1) versus those with seasonal influenza.  
22

23  
24 **Design:** Retrospective analysis of children admitted to hospital with pH1N1 versus  
25 seasonal influenza A.  
26

27  
28 **Setting:** Canadian tertiary referral children's hospital.  
29

30  
31 **Participants:** All laboratory identified cases of pH1N1 in children under the age of 18  
32 years admitted to hospital in 2009 (n=176) and all seasonal influenza A cases admitted to  
33 hospital from influenza seasons 2004-05 to 2008-09 (n=200). Children with onset of  
34 symptoms more than 3 days after admission were excluded.  
35

36  
37 **Primary and secondary outcome measures:** Primary outcomes include admission to  
38 hospital and intensive care, need for mechanical ventilation. Secondary outcomes include  
39 length of stay in hospital and duration of supplemental oxygen requirement.  
40

41  
42 **Results:** Children admitted with pH1N1 were older than seasonal influenza A admissions  
43 (hospital admission: 6.5 vs 3.3 years, p<0.01; ICU admission: 7.3 vs 3.6 years, p=0.02).  
44 Children hospitalized with pH1N1 were more likely to have a pre-existing diagnosis of  
45  
46  
47  
48  
49  
50  
51  
52

1  
2  
3  
4  
5  
6  
7  
8 asthma (15% vs 5%, p<0.01); however there was no difference in the severity of pre-  
9 existing asthma between the two groups. After controlling for obesity, asthma (OR 4.59,  
10 95% CI 1.42-14.81) and age > 5 years (OR 2.87, 95% CI 1.60-5.16) were more common  
11 as risk factors in admitted children with pH1N1. Asthma was a significant predictor of  
12 the need for intensive care in pH1N1 (OR 4.56, 95% CI 1.16-17.89) but not seasonal  
13 influenza A patients.

14 **Conclusion:** While most pH1N1 cases presented with classic influenza-like symptoms,  
15 risk factors for severe pH1N1 disease differed from seasonal influenza A. Older age and  
16 asthma were associated with increased admission to hospital and ICU for children with  
17 pH1N1.

1  
2  
3  
4  
5  
6  
7  
8  
9  
10  
11  
12  
13  
14  
15  
16  
17  
18  
19  
20  
21  
22  
23  
24  
25  
26  
27

## ARTICLE SUMMARY

### Article focus

- Young age and underlying medical conditions have traditionally been considered risk factors for severe influenza in children.

- Children admitted with H1N1 influenza are more likely to have asthma, however, the impact of asthma severity is unknown.

### Key messages

- The presence of asthma and increased age, but not severity of asthma, were more common as risk factors for hospitalization with severe H1N1 influenza than with seasonal influenza A.

- These results suggest that in future pandemics, certain high-risk groups may be more adversely affected than expected with seasonal influenza.

- Treatment of H1N1 influenza with oseltamivir did not appear to be associated with differing outcomes or severity of disease.

28  
29  
30  
31  
32  
33  
34  
35  
36  
37  
38  
39  
40  
41  
42  
43  
44  
45  
46  
47  
48  
49  
50  
51  
52  
53  
54  
55  
56  
57  
58  
59  
60

### Strengths and limitations of this study

- The strength of this study is that it compares a large number of children admitted with microbiologically confirmed pH1N1 to those admitted over five years with seasonal influenza A. For each admitted child with suspected asthma, at least two physicians reviewed the case to confirm a diagnosis of pre-existing asthma and to grade the asthma as mild, moderate, or severe.

- The main limitations to this study include its retrospective design, single-center site, the inability to calculate population-based rates, and that the number of admitted patients with asthma, particularly to ICU, was small.

### INTRODUCTION

~~In a large global pooled analysis of patients of all ages, the risk factors for severe pandemic H1N1 (pH1N1) disease have been found to have some notable differences from seasonal influenza including younger age, obesity, and pregnancy. [1] In the pediatric population, infants and young children have traditionally been considered at risk for severe seasonal influenza A.[2-3] In a large global pooled analysis of patients of all ages, the risk factors for severe pandemic H1N1 (pH1N1) disease have been found to have some notable differences from seasonal influenza including younger age, obesity, and pregnancy.[1] In the pediatric population, infants and young children have traditionally been considered at risk for severe seasonal influenza A.[2-3] However, recently published pediatric studies suggest that while most cases of pH1N1 are relatively mild, older children, especially those suffering from asthma and obesity, may be at higher risk for severe disease. Rates of pediatric intensive care admission, mechanical ventilation, and mortality associated with pH1N1 may be higher than those~~

1  
2  
3  
4  
5  
6  
7  
8 associated with seasonal influenza.[4-7]  
9

10  
11 A previous study from our center following the first wave of the pandemic found  
12 that children admitted with pH1N1 were significantly older and more likely to have  
13 asthma than those admitted with seasonal influenza A.[8] In late 2009, a second wave of  
14 pH1N1 resulted in more admissions to our hospital. The increase in pH1N1 cases allowed  
15 us to verify the findings of our initial study, and identify independent risk factors for  
16 admission to the intensive care unit (ICU) among pH1N1 and seasonal influenza  
17 hospitalized cases through multivariable analyses. Finally, we wanted to understand how  
18 differences in diagnostic methods and treatment between pH1N1 and seasonal influenza  
19 might affect outcomes. Thus our primary goals in this study were to compare the  
20 ageadjusted proportions of asthmatics among children admitted to hospital and the ICU  
21 with pH1N1 relative to those admitted with seasonal influenza, and determine whether  
22 age and asthma are independent predictors of ICU admission in pH1N1 as well as  
23 seasonal influenza infection. Secondary goals were to describe clinical features, other  
24 markers of illness severity, and effect of antiviral therapy and diagnostic methods on  
25 outcomes in children with pH1N1.  
26  
27  
28  
29  
30  
31  
32  
33  
34  
35  
36  
37  
38  
39  
40  
41  
42

### 43 DESIGN

44 We identified and reviewed health records of all laboratory-confirmed cases of  
45 pH1N1 [in children under the age of 18 years](#) admitted in 2009 to The Hospital for Sick  
46 Children (SickKids), a large pediatric referral hospital in Toronto, Canada with over  
47 14,000 admissions per year.[9] [Cases were identified through a review of microbiology](#)  
48  
49  
50  
51  
52  
53  
54  
55  
56  
57  
58  
59  
60

1  
2  
3  
4  
5  
6  
7  
8 [laboratory records](#). We compared children admitted with pH1N1 to those admitted with  
9 seasonal influenza A during the 2004-2005 through 2008-2009 influenza seasons. In  
10 order to exclude potential hospital-acquired infections, [we excluded any children only](#)  
11 [children](#) who developed influenza-like symptoms [on or after prior to](#) the third day of  
12 admission, [were included in this study](#). [Testing was done at the clinical discretion of the](#)  
13 [attending physician](#). All patients with influenza-like illness were initially screened for  
14 influenza by direct immunofluorescence assay (DFA). During the first wave of the  
15 pandemic, all inpatient respiratory samples were tested using reverse transcription  
16 polymerase chain reaction (RT-PCR) with primers developed by the National  
17 Microbiology Laboratory, Winnipeg, Manitoba.[10] During the second wave, all  
18 inpatient respiratory samples were tested with a commercial real-time RT-PCR kit  
19 (RTPCR Kit 1.0, Astra Diagnostics, Hamburg). Seasonal influenza cases were identified  
20 through DFA and/or viral culture. Two physicians (MB and DT) reviewed each potential  
21 case of asthma to confirm the diagnosis and determine severity (Web Table). Any  
22 discrepancies were adjudicated by an asthma specialist (PS).  
23  
24  
25  
26  
27  
28  
29  
30  
31  
32  
33  
34  
35  
36  
37  
38

39 Comparisons were made between the pH1N1 and seasonal influenza A groups  
40 and between the first and second waves of pH1N1. Differences in normally distributed  
41 continuous variables were analyzed using Student's *t* test. Comparisons of skewed data  
42 (length of stay and age) were analyzed using non parametric Mann-Whitney and  
43 Kruskal-Wallis methods. The [chi-square](#) or Fisher's exact test was used to compare  
44 categorical variables between groups and as a test of heterogeneity among multiple  
45 proportions. We performed multivariable logistic regression to 1) adjust for the potential  
46  
47  
48  
49  
50  
51  
52  
53  
54  
55  
56  
57  
58  
59  
60



1  
2  
3  
4  
5  
6  
7  
8  
9  
10  
11  
12  
13  
14  
15  
16  
17  
18  
19  
20  
21  
22  
23  
24  
25  
26  
27  
28  
29  
30  
31  
32  
33  
34  
35  
36  
37  
38  
39  
40  
41  
42  
43  
44  
45  
46  
47  
48  
49  
50  
51  
52  
53  
54  
55  
56  
57  
58  
59  
60

confounding effect of age (as a continuous variable and categorical variable) on asthma as a risk factor in comparing the severity of pH1N1 and seasonal influenza; and 2) construct models of risk for ICU admission in pH1N1 and seasonal influenza A infection that included age (as a continuous variable and categorical variable), asthma, and obesity as independent variables. All statistical analysis was performed using Stata SE 10.[11]

SM and DT conceived of and designed the study, conducted the analysis, interpreted the data, and drafted the original manuscript. PP, MB, PS, SO, MB and UA contributed to the analysis and interpretation of data. All authors critically revised the article for important intellectual content and gave final approval of the version to be published. The SickKids Research Ethics Board approved and waived individual informed consent for this study.

## RESULTS

179 children with pH1N1 were admitted in 2009 in two waves (May to July 2009 n=58, September to December 2009 n=118) (Figure 1), of whom 3 were excluded because the onset of symptoms was more than three days after admission. 200 children were admitted to hospital with seasonal influenza A over five seasons (2004-2005 n=46; 2005-2006 n=26; 2006-2007 n=36; 2007-2008 n=56; 2008-2009 n=36). There were no differences across the years of seasonal influenza cases in terms of demographic characteristics, underlying risk factors, or outcomes (data not shown).

### Demographic Characteristics

Characteristics of children with pH1N1 and seasonal influenza are shown in Table

1. Children with pH1N1 were significantly older than those with seasonal influenza A (6.5 vs 3.3 years,  $p\text{-value}<0.01$ ). The proportion of children over 5 years was higher in pH1N1 (61% vs 38%,  $p<0.01$ ) whereas the proportion under 2 years was higher in seasonal influenza A (37% vs 18%,  $p<0.01$ ). Children admitted to ICU with pH1N1 were older than those with seasonal influenza A (7.3 vs 3.6 years,  $p=0.02$ ).

### Disease Severity

Requirement and duration of oxygen therapy, ICU admission, mechanical ventilation and total length of hospital stay are shown in Table 1. 59 (34%) patients admitted with pH1N1 required oxygen supplementation. 32 (18%) children with pH1N1 required admission to ICU and of these, 18 (56%) required mechanical ventilation. There was no difference in ICU admission or need for mechanical ventilation between pH1N1 and seasonal influenza A. More children admitted during the first wave required oxygen than those admitted during the second wave (47% vs 28%,  $p=0.01$ ). When examining only children who did not receive antiviral therapy, the difference in oxygen use between waves 1 and 2 remained significant (48% vs 19%,  $p=0.03$ ). None of the pH1N1 patients died.

### Clinical and Laboratory Characteristics

Most pH1N1 cases presented with fever and cough. More than one-third had

1  
2  
3  
4  
5  
6  
7  
8 gastrointestinal symptoms (Table 2). The laboratory results of children admitted with  
9  
10  
11  
12  
13  
14  
15  
16  
17  
18  
19  
20  
21  
22  
23  
24  
25  
26  
27  
28  
29  
30  
31  
32  
33  
34  
35  
36  
37  
38  
39  
40  
41  
42  
43  
44  
45  
46  
47  
48  
49  
50  
51  
52  
53  
54  
55  
56  
57  
58  
59  
60  
gastrointestinal symptoms (Table 2). The laboratory results of children admitted with  
pH1N1 are shown in Table 3. Four patients had positive blood cultures during their  
admission (*Streptococcus pneumoniae* (2), Viridans group *Streptococcus* (1),  
*Pseudomonas aeruginosa* (1)).

### Risk Factors

Children with pH1N1 compared to those with seasonal influenza were more likely  
to have history of asthma (15% vs 5%,  $p<0.01$ ); however, there was no difference in the  
severity of asthma between the two groups (Table 4). Cardiac disease (11% vs 4%,  
 $p=0.02$ ) and age under 2 years with no other risk factors (18% vs 9%,  $p=0.02$ ) were more  
common in children hospitalized with seasonal influenza. In patients requiring intensive  
care, history of asthma was more common in pH1N1 than in seasonal influenza A;  
however, this difference did not reach statistical significance (19% vs 3%,  $p=0.10$ ).  
In a multivariable analysis including obesity, age category, and asthma, both age  
greater than 5 (with age  $\leq 2$  as reference) (OR 2.87 95% CI 1.60-5.16) and history of  
asthma (OR 4.59, 95% CI 1.42-14.81) were more common as risk factors in admitted  
children with pH1N1 compared to seasonal influenza A. In the same analysis but using  
age as a continuous rather than categorical variable, asthma remained more common as a  
risk factor in pH1N1 (OR 8.77, 95% CI 1.85-41.52). Table 5 displays multivariable  
logistic regression analyses for predictors of ICU admission with pH1N1 and with  
seasonal influenza A infection. In multivariable models including obesity, age category  
and underlying asthma as independent variables, asthma was a significant predictor of the  
need for intensive care with pH1N1 infection (OR 4.56, 95% CI 1.16-17.89) but not with

1  
2  
3  
4  
5  
6  
7  
8 seasonal influenza A infection. When the multivariable models included age as a  
9 continuous instead of categorical variable, underlying asthma remained a significant  
10 predictor of the need for ICU care with pH1N1 infection (OR 5.22, 95% CI 1.23-22.08).

11  
12  
13  
14 In children with asthma, 29% of those with pH1N1 versus 33% of those with  
15 seasonal influenza presented with acute wheeze (p=0.81). In children without underlying  
16 asthma, there was no difference in presentation with acute wheeze in those with pH1N1  
17 (15%) and those with seasonal influenza (12%), p=0.51.  
18  
19  
20  
21  
22  
23

### 24 **Diagnosis and Management**

25 At our institution, seasonal influenza was diagnosed by DFA supplemented with  
26 viral culture whereas cases positive by DFA for pH1N1 required confirmation by PCR.  
27 To assess the potential impact of differing diagnostic methods, we re-analyzed all cases  
28 restricting solely to those positive by DFA. The only changes from the previously  
29 presented results were that the length of stay in hospital was longer in seasonal influenza  
30 (median 3.5 vs 3 days, p=0.03) and that underlying chronic lung disease (excluding  
31 asthma) was no longer significantly more common in those admitted to ICU with  
32 seasonal influenza A (p=0.09).  
33  
34  
35  
36  
37  
38  
39  
40  
41  
42

43 Children with pH1N1 were more likely to receive antiviral therapy (61% vs 8%,  
44 p<0.01). There were significant changes in how pH1N1 was managed between waves;  
45 19% of children received antiviral therapy during wave 1 compared to 82% in wave 2 (p  
46 < 0.01). However, when comparing all children with pH1N1 who received antiviral  
47 therapy to those who did not, there were no significant differences in the need for ICU  
48  
49  
50  
51  
52  
53  
54  
55  
56  
57  
58  
59  
60

1  
2  
3  
4  
5  
6  
7  
8 admission (22% vs 14%,  $p=0.07$ ), mechanical ventilation (14% vs 8%,  $p=0.08$ ), or length  
9  
10 of stay in hospital (median duration 3 days vs 3 days,  $p=0.68$ ). To test if sicker children  
11  
12 received antiviral therapy, we compared all available Canadian Triage and Acuity  
13  
14 Scores[12] (CTAS), a standardized measure of disease acuity, between pH1N1 patients  
15  
16 who did ( $n=65$ ), and did not ( $n=42$ ) receive antiviral therapy and did not find a significant  
17  
18 difference between the two groups ( $p=0.70$ ).  
19

## 20 21 22 **DISCUSSION**

23  
24 Most cases of pH1N1 presented with a classic influenza-like illness, with no  
25  
26 convincing evidence that pH1N1 was more severe than seasonal influenza. However, the  
27  
28 risk factors for admission to hospital and ICU differed between pH1N1 and seasonal  
29  
30 influenza. Older age was a greater risk factor for admission to hospital and ICU for  
31  
32 pH1N1 and asthma was a greater risk factor for hospitalization for pH1N1. These results  
33  
34 corroborate earlier research based on fewer cases from our institution[8] as well as a  
35  
36 recent study from Colorado comparing children admitted to hospital with pH1N1 to those  
37  
38 with 2008-09 seasonal influenza A or B.[13] Conversely, underlying cardiac disease in  
39  
40 those admitted to hospital and non-asthma chronic lung disease in those admitted to ICU  
41  
42 were significantly more common in seasonal influenza. These results suggest that risk  
43  
44 factors for new influenza strains and that high-risk groups during future pandemics may  
45  
46 not be simply extrapolated from the experience with seasonal strains.

47  
48 Guidelines from the Public Health Agency of Canada highlighted children less  
49  
50 than 2 years of age as a high-risk group for pH1N1.[14] However, our results of a median  
51  
52 age of 6.5 years in hospitalized pH1N1 patients is remarkably similar to studies from  
53  
54  
55  
56  
57  
58  
59  
60

1  
2  
3  
4  
5  
6  
7  
8 California[15] (median age 6 years) and Japan[16] (median age 7 years). While we found  
9 the proportion of hospitalized cases higher in older age categories in pH1N1, in the  
10 absence of community population-based epidemiologic data, we are not able to comment  
11 on any differences that may exist in age-specific attack, hospitalization, or ICU admission  
12 rates in our study population.  
13  
14  
15  
16  
17

18  
19  
20 This study was not designed to identify the impact of differing management  
21 strategies on severity and outcomes of pH1N1. However, in contrast to the first study  
22 from our centre, in this study, differences in antiviral use between waves allowed for an  
23 interesting natural experiment. Overall, during the first wave, 0%, 46%, and 14% of  
24 children aged under 2 years, 2 to 4 years, and 5 years and over respectively received  
25 oseltamivir. During the second wave, 65%, 88%, and 86% of children under 2 years, 2 to  
26 4 years, and 5 years and over respectively received antiviral therapy. While there was no  
27 difference in markers of disease severity including ICU admission, mechanical  
28 ventilation, and length of hospital stay between the two pandemic waves, there was a  
29 greater need for oxygen in children hospitalized during wave 1. This difference only  
30 remained significant when restricting the analysis to those who did not receive antiviral  
31 therapy. This finding may reflect increased antiviral use directed at sicker children during  
32 wave 2, while the mildest cases did not receive antivirals.  
33  
34  
35  
36  
37  
38  
39  
40  
41  
42  
43  
44  
45

46  
47 In the previous analysis of the first wave of pH1N1 in Toronto, asthma was a  
48 more significant risk factor for pH1N1 than for seasonal influenza.[8] In this study, with  
49 more than 3 times the number of pH1N1 cases, we confirm the significance of asthma as  
50  
51  
52  
53  
54  
55  
56  
57  
58  
59  
60

1  
2  
3  
4  
5  
6  
7  
8 a major risk factor; controlling for obesity and age (as a continuous variable) asthma was  
9 more likely to be present in hospitalized children with pH1N1 (OR 4.59, 95% CI 1.42-  
10 14.81 than with seasonal influenza A. In pH1N1 cases, asthma was associated with  
11 admission to ICU (OR 4.56, 95% CI 1.16-17.89). This is in contrast to seasonal influenza  
12 A in which underlying asthma was not significantly associated with ICU admission (OR  
13 2.47, 95% CI 0.24-25.80). We did not find that the severity of asthma was differentially  
14 associated with hospitalization or ICU admission between pH1N1 and seasonal influenza.  
15 While 6 (19%) ICU admissions with pH1N1 had asthma (4 mild, 1 moderate, and 1  
16 severe) compared to only 1 (3%) (mild) ICU admission with seasonal influenza, the  
17 numbers were too small to be able to demonstrate a difference. In a large California study  
18 of 345 children hospitalized or who died with pH1N1, 31% of hospitalized children and  
19 34% of ICU and/or fatal cases had asthma.[15] In Japan, 14% of non-severe cases of  
20 pH1N1 and 47% of severe cases had asthma,[16] while a United Kingdom study found  
21 asthma was present in 16% of children <16 years and 31% of adults.[17] None of these  
22 studies examined severity of asthma or the differences between pH1N1 and seasonal  
23 influenza.

24  
25  
26  
27  
28  
29  
30  
31  
32  
33  
34  
35  
36  
37  
38  
39  
40  
41 Immunologic studies of severe pH1N1 cases have shown delayed expression of  
42 genes involved in the adaptive immune response, delayed viral clearance, and increased  
43 levels of innate immunity mediators involved in the Th1 and Th17 response.[18-19]  
44  
45  
46 Children with underlying asthma and other groups (such as pregnant women) thought to  
47 be at higher risk for severe pH1N1 disease[20-22] may have an altered immunologic and  
48 inflammatory response to this virus resulting in increased disease severity. Interleukin-5  
49  
50  
51  
52  
53  
54  
55  
56  
57  
58  
59  
60

1  
2  
3  
4  
5  
6  
7  
8 (IL-5) has been shown to be highly expressed in bronchial mucosa of asthmatics,[23] is a  
9 key player in eosinophilic inflammation,[24] and has been found to be higher in serum of  
10 pH1N1 patients with pneumonia than those without.[25] However, further research is  
11 needed to fully understand this association. While there is some evidence in adults that  
12 adjuvant corticosteroids in severe pH1N1 may increase mortality,[26] the impact of  
13 inhaled corticosteroids in childhood asthma on pH1N1 severity is not known and this  
14 study was not designed nor powered to address this question.  
15  
16  
17  
18  
19  
20  
21  
22  
23

24 Influenza vaccination coverage in asthmatic children has been poor in many  
25 countries.[27,28] Some physicians remain skeptical of the need for vaccinating all  
26 asthmatic children [29], while others tend to prioritize children with more severe  
27 asthma.[30] Definitive data has been elusive [31]. Our findings suggest that physicians  
28 should ensure all asthmatic children under their care have been vaccinated against pH1N1  
29 (which is currently included in the standard seasonal influenza vaccine), regardless of  
30 severity of asthma, at least until randomized controlled trial data becomes available.  
31  
32  
33  
34  
35  
36  
37  
38

39 There are several limitations to this study including its retrospective design,  
40 single-center site, and inability to calculate population-based rates. The number of  
41 admitted patients with asthma, particularly to ICU, was small, and this may have  
42 hindered our ability to identify differences in risk based on severity. Additionally, we  
43 identified only the single most important underlying risk factor (with the exception of  
44 asthma, obesity, and age which were all collected for each patient) and thus, we were  
45 unable to explore interactions between risk factors in patients with multiple co-  
46  
47  
48  
49  
50  
51  
52  
53  
54  
55  
56  
57  
58  
59  
60



1  
2  
3  
4  
5  
6  
7  
8 morbidity. Our metrics of influenza severity—ICU admission and duration of stay—may  
9 be impacted by non-medical factors such as bed availability. In regards to oxygen use, we  
10 did not have data on oximetry or criteria that were used by physicians to start or stop  
11 oxygen supplementation and thus it was difficult to determine the significance of the  
12 difference seen in wave 1 versus wave 2. In regards to oseltamivir use, we did not extract  
13 data on dosage, duration, or when the medication was begun. However, the use of  
14 oseltamivir in this study was at the discretion of the attending physician and thus  
15 reflective of ‘real life’ use. [It is possible that we did not identify all patients at our  
16 hospital with influenza \(seasonal or pH1N1\) due to false negative testing or testing being  
17 performed at an outside hospital and not repeated at our institution; however, we expect  
18 both of these cases to be very rare.](#)

## 31 CONCLUSION

32 Risk factors for severe disease, specifically the presence of underlying asthma  
33 and increased age, differed between pH1N1 and seasonal influenza in children. There  
34 was no difference in overall disease severity. These results suggest that in future  
35 pandemics with new influenza strains, high-risk groups may be different than those  
36 traditionally considered as such. The reasons for the differing influence of asthma and  
37 age on host response to pH1N1 are not understood and further study of the underlying  
38 mechanisms contributing to these differences may shed new light on the host-pathogen  
39 immunobiology of a pandemic strain of influenza virus. This study emphasizes the need  
40 to ensure that all asthmatic children have been vaccinated against pH1N1 influenza,  
41 regardless of the severity of their asthma.  
42  
43  
44  
45  
46  
47  
48  
49  
50  
51  
52  
53  
54  
55  
56  
57  
58  
59  
60

1  
2  
3  
4  
5  
6  
7  
8  
9  
10  
11  
12  
13  
14  
15  
16  
17  
18  
19  
20  
21  
22  
23  
24  
25  
26  
27  
28  
29  
30  
31  
32  
33  
34  
35  
36  
37  
38  
39  
40  
41  
42  
43  
44  
45  
46  
47  
48  
49  
50  
51  
52  
53  
54  
55  
56  
57  
58  
59  
60

For peer review only

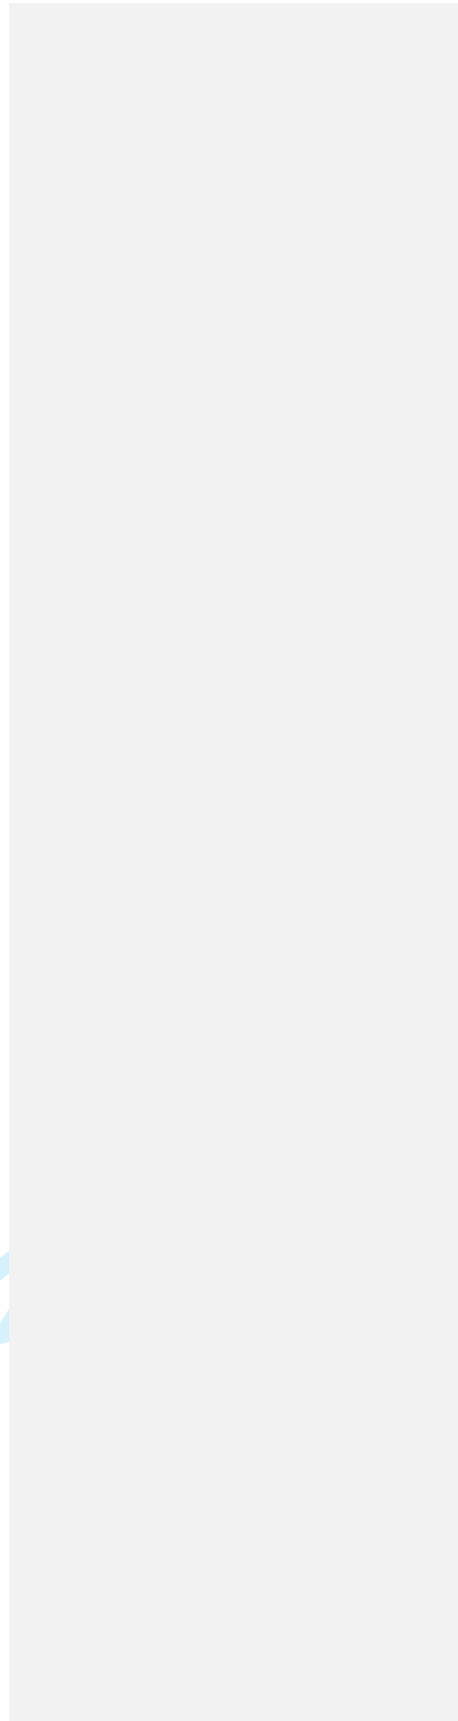

| Characteristic                      | pH1N1 Wave 1 versus Wave 2 |                         |                 | pH1N1 versus Seasonal Influenza |                      |                 |
|-------------------------------------|----------------------------|-------------------------|-----------------|---------------------------------|----------------------|-----------------|
|                                     | pH1N1 1st Wave<br>n=58     | pH1N1 2nd Wave<br>n=118 | p value         | pH1N1 Total<br>n=176            | Seasonal<br>n=200    | p value         |
| Sex, male, no. (%)                  | 35 (60)                    | 72 (61)                 | 0.93            | 107 (61)                        | 108 (54)             | 0.18            |
| Age, yr, median (IQR)               | 6.4 (3.4-10.1)             | 6.5 (2.9-11.4)          | 0.81            | <b>6.5 (3.0-10.6)</b>           | <b>3.3 (1.4-7.8)</b> | <b>&lt;0.01</b> |
| Age group, yr, no (%)               |                            |                         |                 |                                 |                      |                 |
| <2                                  | 8 (14)                     | 23 (19)                 | 0.35            | <b>31(18)</b>                   | <b>74(37)</b>        | <b>&lt;0.01</b> |
| 2 to 5                              | 13 (22)                    | 24 (20)                 | 0.75            | 37(21)                          | 54(27)               | 0.18            |
| >5                                  | 37 (64)                    | 71 (60)                 | 0.64            | <b>108(61)</b>                  | <b>72(36)</b>        | <b>&lt;0.01</b> |
| Admitted to ICU                     |                            |                         |                 |                                 |                      |                 |
| No. (%) of children                 | 12 (21)                    | 20 (17)                 | 0.36            | 32 (18)                         | 31 (15)              | 0.49            |
| Age, yr, median (IQR)               | 5.8 (3.2-7.3)              | 9.2 (5.4-11.4)          | 0.13            | <b>7.3 (4.0-10.6)</b>           | <b>3.6 (1.5-9.7)</b> | <b>0.02</b>     |
| Required Mechanical Ventilation     |                            |                         |                 |                                 |                      |                 |
| No. (%) of children                 | 7 (12)                     | 11 (9)                  | 0.57            | 18 (10)                         | 19 (10)              | 0.81            |
| No. (%) of children admitted to ICU | 7 (58)                     | 11 (55)                 | 0.85            | 18 (56)                         | 19 (61)              | 0.69            |
| Required Supplemental Oxygen        |                            |                         |                 |                                 |                      |                 |
| No. (%) of children                 | 26 (47)                    | 33 (28)                 | 0.013           | 59 (34)                         | n/a                  | n/a             |
| Duration of Oxygen, d, median (IQR) | 4 (2-6)                    | 3(2-7)                  | 0.73            | 3 (2-6)                         | n/a                  | n/a             |
| Length of stay, d, median (IQR)     |                            |                         |                 |                                 |                      |                 |
| In hospital                         | 4 (2-6)                    | 3 (2-5)                 | 0.06            | 3 (2-5)                         | 4 (2-7)              | 0.12            |
| In ICU                              | 3.5 (2.5-17)               | 2 (1.5-5)               | 0.08            | 3 (2-8)                         | 2 (1-5)              | 0.24            |
| Anti-viral therapy No. (%)          | <b>11 (19)</b>             | <b>97 (82)</b>          | <b>&lt;0.01</b> | <b>108 (61)</b>                 | <b>16 (8)</b>        | <b>&lt;0.01</b> |

Table 1: Demographic and clinical characteristics of pH1N1 and seasonal influenza

|                  | pH1N1 Symptoms |             |         | Seasonal Influenza Symptoms |             |             |         |             |
|------------------|----------------|-------------|---------|-----------------------------|-------------|-------------|---------|-------------|
|                  | 0 to <2 yrs    | 2 to <5 yrs | >5 yrs  | 0 to 18 yrs                 | 0 to <2 yrs | 2 to <5 yrs | >5 yrs  | 0 to 18 yrs |
| Fever            | 31 (100)       | 36 (97)     | 99 (92) | 166 (94)                    | 64 (86)     | 45 (83)     | 59 (82) | 168 (84)    |
| Cough            | 29 (94)        | 34 (92)     | 84 (78) | 147 (84)                    | 34 (46)     | 29 (54)     | 39 (54) | 102 (51)    |
| Gastrointestinal | 14 (45)        | 16 (43)     | 40 (37) | 70 (40)                     | 13 (15)     | 14 (26)     | 6 (8)   | 33 (16)     |
| Wheeze           | 4 (13)         | 8 (22)      | 24 (22) | 36 (20)                     | 11 (15)     | 5 (9)       | 14 (19) | 30 (15)     |
| Pneumonia        | 11 (35)        | 12 (32)     | 29 (27) | 52 (30)                     | 9 (12)      | 8 (15)      | 19 (26) | 36 (18)     |
| Apnea            | 3 (10)         | 3 (8)       | 2 (2)   | 8 (5)                       | 0 (0)       | 0 (0)       | 0 (0)   | 0 (0)       |
| Seizure          | 2 (7)          | 5 (14)      | 2 (2)   | 9 (5)                       | 8 (11)      | 6 (11)      | 4 (6)   | 18 (9)      |
| Encephalopathy   | 1 (3)          | 1 (3)       | 2 (2)   | 4 (2)                       | 0 (0)       | 0 (0)       | 1 (14)  | 1 (0.5)     |
| Myocarditis      | 0 (0)          | 1 (3)       | 1 (1)   | 2 (1)                       | 0 (0)       | 0 (0)       | 0 (0)   | 0 (0)       |
| Myositis         | 0 (0)          | 0 (0)       | 2 (2)   | 2 (1)                       | 0 (0)       | 1 (2)       | 0 (0)   | 1 (0.5)     |

- Formatted: Highlight

Table 2: Clinical characteristics of pH1N1 and seasonal influenza by age category

1  
2  
3  
4  
5  
6  
7  
8  
9  
10  
11  
12  
13  
14  
15  
16  
17  
18  
19  
20  
21  
22  
23  
24  
25  
26  
27  
28  
29  
30  
31  
32  
33  
34  
35  
36  
37  
38  
39  
40  
41  
42  
43  
44  
45  
46  
47  
48  
49

| Lab Value                                   | pH1N1 influenza<br>Number (%) | Seasonal influenza<br>Number (%) |
|---------------------------------------------|-------------------------------|----------------------------------|
| White blood cells $\geq 11.0 \times 10^9/L$ | 50 (29)                       | 60 (31)                          |
| White blood cells $< 4.0 \times 10^9/L$     | 33 (19%)                      | 34 (17)                          |
| Absolute neutrophils $>6.6 \times 10^9/L$   | 59 (35)                       | 60 (31)                          |
| Absolute neutrophils $<1.5 \times 10^9/L$   | 30 (18)                       | 36 (19)                          |
| Absolute lymphocytes $< 1.8 \times 10^9/L$  | 112 (66)                      | 102 (53)                         |

- Formatted: Highlight

Table 3: Haematologic laboratory values for children admitted with pH1N1 and seasonal influenza.

Footnote: For pH1N1 influenza, 174 children had complete blood count and 170 had differential performed. For seasonal influenza, 196 children had complete blood count and 193 had differential performed.

| Risk Factor                      | All Children Admitted to Hospital |                   |                 | Children Admitted to PICU |                  |             |
|----------------------------------|-----------------------------------|-------------------|-----------------|---------------------------|------------------|-------------|
|                                  | pH1N1<br>n=176                    | Seasonal<br>n=200 | p value         | pH1N1<br>n=32             | Seasonal<br>n=31 | p value*    |
| Asthma                           | <b>26 (15)#</b>                   | <b>9 (5)</b>      | <b>&lt;0.01</b> | 6 (19)                    | 1 (3)            | 0.10        |
| Mild Asthma                      | 16(62)                            | 7(78)             | 0.38            | 4(67)                     | 1(100)           | 1.00        |
| Moderate Asthma                  | 6(23)                             | 1(11)             | 0.44            | 1 (17)                    | 0(0)             | 1.00        |
| Severe Asthma                    | 4 (15)                            | 1(11)             | 0.75            | 1(17)                     | 0(0)             | 1.00        |
| Chronic Lung Disease             | 12 (7)                            | 13 (7)            | 0.92            | <b>0 (0)</b>              | <b>5 (16)</b>    | <b>0.02</b> |
| Obesity#                         | 8(7)                              | 14(9)             | 0.64            | 3 (20)                    | 2 (9)            | 0.38        |
| Cardiac Disease                  | <b>7 (4)</b>                      | <b>21 (11)</b>    | <b>0.02</b>     | 3 (9)                     | 4 (12)           | 0.71        |
| Hemoglobinopathy                 | 19 (11)                           | 22 (11)           | 0.95            | 1 (3)                     | 1 (3)            | 0.75        |
| Immunodeficiency                 | 32 (18)                           | 42 (21)           | 0.49            | 1 (3)                     | 2 (3)            | 0.61        |
| Neurologic Impairment            | 21 (12)                           | 26 (13)           | 0.76            | 6 (19)                    | 8 (26)           | 0.56        |
| Age <2 and no other risk factors | <b>16 (9)</b>                     | <b>35 (18)</b>    | <b>0.02</b>     | 2 (6)                     | 4 (13)           | 0.43        |

Table 4^: Risk factors for admission to hospital and intensive care unit, pandemic H1N1 versus seasonal influenza A

Footnotes: # Percentages in parentheses. \*Fisher's exact test used when cell size is small. †Obesity was defined according to guidelines from the Centers for Disease Control as a body mass index ≥ 95<sup>th</sup> percentile for age in children older than 2 years.[32] Obesity could not be calculated for 45(31%) & 68(54%) children > 2 years in the seasonal and pH1N1 groups respectively. ^ Any differences between the numbers presented in Table 4 and those from O’Riordan et al. [8] are the result of a re-assessment of all pH1N1 and seasonal influenza cases for this study.

| Risk Factor           | pH1N1 |        |        | Seasonal Influenza |        |        |
|-----------------------|-------|--------|--------|--------------------|--------|--------|
|                       | OR    | L95%CI | U95%CI | OR                 | L95%CI | U95%CI |
| Asthma                | 4.56  | 1.16   | 17.89  | 2.47               | 0.24   | 25.80  |
| Obesity               | 4.18  | 0.76   | 22.95  | 1.06               | 0.20   | 5.64   |
| Age 0 to <2<br>Years  | 1.00  |        |        | 1.00               |        |        |
| Age 2 to < 5<br>Years | 1.70  | 0.30   | 9.48   | 1.40               | 0.44   | 4.44   |
| Age >5 Years          | 0.89  | 0.19   | 4.07   | 0.62               | 0.19   | 1.98   |

- Formatted: Highlight

Table 5: Multivariable regression of asthma, obesity, and age category as risk factors for ICU admission with pH1N1 and seasonal influenza A.

Footnote: ^ Asthma was also common as a risk factor (OR 8.77, 95% CI 1.85-41.52) for admission to hospital in pH1N1 compared to seasonal influenza (with age as continuous variable). Unadjusted (univariate) OR's for pH1N1: asthma (OR 1.43, 95% CI 0.52-3.91), obesity (OR 3.25, 95% CI 0.81-19.69), age 0 to <2 (OR 1.00), age 2 to <5 (OR 2.18, 95% CI 0.51-9.26), age >5 (OR 2.39, 0.66-8.58). Unadjusted (univariate) OR's for seasonal influenza: asthma (OR 0.67, 95% CI 0.08-5.56), obesity (OR 1.14, 95% CI 0.22-5.99), age 0 to <2 (OR 1.00), age 2 to <5 (OR 1.30, 95% CI 0.51-3.32), age >5 (OR 0.92, 95% CI 0.36-2.33).

1  
2  
3  
4  
5  
6  
7  
8  
9  
10  
11  
12  
13  
14  
15  
16  
17  
18  
19  
20  
21  
22  
23  
24  
25  
26  
27  
28  
29  
30  
31  
32  
33  
34  
35  
36  
37  
38  
39  
40  
41  
42  
43  
44  
45  
46  
47  
48  
49  
50  
51  
52  
53  
54  
55  
56  
57  
58  
59  
60

Formatted: Centered

### References

- 1 Van Kerkhove MD, Vandemaële KAH, Shinde V, et al. Risk factors for severe outcomes following 2009 influenza A (H1N1) infection: A global pooled analysis. *PLoS Med* 2011;**8**(7):e1001053.
- 2 Iskander M, Booy R, Lambert S. The burden of influenza in children. *Curr Opin Infect Dis* 2007;**20**(3):259-263.
- 3 Pickering LK, Baker CJ, Overturth GD, et al editors. Red Book 2009 Report of the Committee on Infectious Diseases. 28th ed. Elk Grove Village, IL: American Academy of Pediatrics; 2009.
- 4 Libster R, Bugna J, Coviello S, et al. Pediatric hospitalizations associated with 2009 pandemic influenza A (H1N1) in Argentina. *N Engl J Med* 2010;**362**(1):45-55.
- 5 Plessa E, Diakakis P, Gardelis J, et al. Clinical Features, Risk Factors, and Complications Among Pediatric Patients With Pandemic Influenza A (H1N1). *Clin Pediatr (Phila)* 2010;**49**(8):777-781.
- 6 Kumar S, Havens PL, Chusid MJ, et al. Clinical and epidemiologic characteristics of children hospitalized with 2009 pandemic H1N1 influenza A infection. *Pediatr Infect Dis J* 2010;**29**(7):591-594.



1  
2  
3  
4  
5  
6  
7  
8  
9  
10  
11  
12  
13  
14  
15  
16  
17  
18  
19  
20  
21  
22  
23  
24  
25  
26  
27  
28  
29  
30  
31  
32  
33  
34  
35  
36  
37  
38  
39  
40  
41  
42  
43  
44  
45  
46  
47  
48  
49  
50  
51  
52  
53  
54  
55  
56  
57  
58  
59  
60

7 Engelhard D, Bromberg M, Averbuch D, et al. Increased extent of and risk factors for pandemic (H1N1) 2009 and seasonal influenza among children, Israel. *Emerg Infect Dis* 2011;**17**(9):1740-1743.

8 O'Riordan S, Barton M, Yau Y, et al. Risk factors and outcomes among children admitted to hospital with pandemic H1N1 influenza. *CMAJ* 2010;**182**(1):39-44.

9 The Hospital for Sick Children. The Year in Review 2009-2010. The Annual Report of The Hospital for Sick Children. Toronto, Ontario: The Hospital for Sick Children 2010.

10 Cutler J, Schleihauf E, Hachette TF, et al. Investigation of the first cases of human-tohuman

infection with the new swine-origin influenza A (H1N1) virus in Canada. *CMAJ* 2009;**181**(3-4):159-163.

11 StataCorp. Stata statistical software: Release 10. 2007.

12 Warren DW, Jarvis A, LeBlanc L, et al. Revisions to the Canadian Triage and Acuity Scale paediatric guidelines (PaedCTAS). *CJEM* 2008;**10**(3):224-243.

13 Bagdure D, Curtis DJ, Dobyns E, et al. Hospitalized children with 2009 pandemic influenza A (H1N1): comparison to seasonal influenza and risk factors for admission to the ICU. *PLoS One* 2010; **5**(12):e15173.

14 Public Health Agency of Canada. Clinical recommendations for patients presenting with respiratory symptoms during the 2009–2010 influenza season. 2010; Available at: [http://www.phac-aspc.gc.ca/alert-alerte/h1n1/pdf/H1N1\\_DecisionTree\\_oct23\\_e.pdf](http://www.phac-aspc.gc.ca/alert-alerte/h1n1/pdf/H1N1_DecisionTree_oct23_e.pdf). Accessed December 3, 2010.

15 Louie JK, Gavali S, Acosta M, et al. Children Hospitalized With 2009 Novel Influenza A(H1N1) in California. *Arch Pediatr Adolesc Med* 2010;**164**(11):1023-1031.

- 1  
2  
3  
4  
5  
6  
7  
8 16 Okada T, Morozumi M, Matsubara K, et al. Characteristic findings of pediatric  
9 inpatients with pandemic (H1N1) 2009 virus infection among severe and nonsevere  
10 illnesses. *J Infect Chemother* 2011;**17**(2):238-245.  
11  
12  
13  
14 17 Nguyen-Van-Tam JS, Openshaw PJ, Hashim A, et al. Risk factors for hospitalisation  
15 and poor outcome with pandemic A/H1N1 influenza: United Kingdom first wave (May-  
16 September 2009). *Thorax* 2010;**65**(7):645-651.  
17  
18  
19  
20 18 Bermejo-Martin JF, Martin-Loeches I, Rello J, et al. Host adaptive immunity  
21 deficiency in severe pandemic influenza. *Crit Care* 2010;**14**(5):R167.  
22  
23  
24 19 Bermejo-Martin JF, Ortiz de Lejarazu R, Pumarola T, et al. Th1 and Th17  
25 hypercytokinemia as early host response signature in severe pandemic influenza. *Crit*  
26 *Care* 2009;**13**(6):R201.  
27  
28  
29  
30 20 Louie JK, Acosta M, Jamieson DJ, et al. Severe 2009 H1N1 influenza in pregnant and  
31 postpartum women in California. *N Engl J Med* 2010;**362**(1):27-35.  
32  
33  
34 21 Creanga AA, Johnson TF, Graitcer SB, et al. Severity of 2009 pandemic influenza A  
35 (H1N1) virus infection in pregnant women. *Obstet Gynecol* 2010;**115**(4):717-726.  
36  
37  
38 22 Siston AM, Rasmussen SA, Honein MA, et al. Pandemic 2009 influenza A(H1N1)  
39 virus illness among pregnant women in the United States. *JAMA* 2010; **303**(15):1517-  
40 1525.  
41  
42  
43 23 Kotsimbos AT, Hamid Q. IL-5 and IL-5 receptor in asthma. *Mem Inst Oswaldo Cruz*  
44 1997;**92** Suppl 2:75-91.  
45  
46  
47 24 Wang J, Young IG. Eosinophilic inflammation: mechanisms regulating IL-5  
48 transcription in human T lymphocytes. *Allergy* 2007;**62**(10):1131-1138.  
49  
50  
51 25 Takano T, Tajiri H, Kashiwagi Y, Kimura S, Kawashima H. Cytokine and chemokine  
52  
53  
54  
55  
56  
57  
58  
59  
60

- 1  
2  
3  
4  
5  
6  
7  
8 response in children with the 2009 pandemic influenza A (H1N1) virus infection. *Eur J*  
9 *Clin Microbiol Infect Dis* 2011;**30(1)**:117-120.
- 10  
11 26 Kim SH, Hong SB, Yun SC, et al. Corticosteroid treatment in critically ill patients  
12 with pandemic influenza A/H1N1 2009 infection: analytic strategy using propensity  
13 scores. *Am J Respir Crit Care Med* 2011;183(9):1207-14.
- 14  
15  
16 27 Centers for Disease Control and Prevention (CDC) *MMWR Morb Mortal Wkly Rep*.  
17 2007;56(9):193-6.
- 18  
19 28 Low influenza vaccination coverage in asthmatic children in France in 2006-7. *Euro*  
20 *Surveill*. 2008;13(43):pii:19016
- 21  
22 29 Bueving HJ. Is influenza vaccination in asthmatic children helpful? *Clin Exp Allergy*.  
23 2006;36(1):21-5.
- 24  
25  
26 30 Dombkowski KJ, Leung SW, Clark SJ. Physician perspectives regarding annual  
27 influenza vaccination among children with asthma. *Ambul Pediatr*. 2008;8(5):294-9.
- 28  
29 31 Cates CJ, Jefferson TO, Rowe BH. Vaccines for preventing influenza in people with  
30 asthma. *Cochrane Database Syst Rev*. 2008;(2):CD000364
- 31  
32 32 Centers for Disease Control (CDC). Defining Childhood Overweight and Obesity.  
33 2010; Available at: <http://www.cdc.gov/obesity/defining.html>. Accessed October 1, 2011.
- 34  
35  
36  
37  
38  
39  
40  
41  
42  
43  
44  
45  
46  
47  
48  
49  
50  
51  
52  
53  
54  
55  
56  
57  
58  
59  
60

Number of Influenza A Detected, SickKids, by report week, 2009-2010

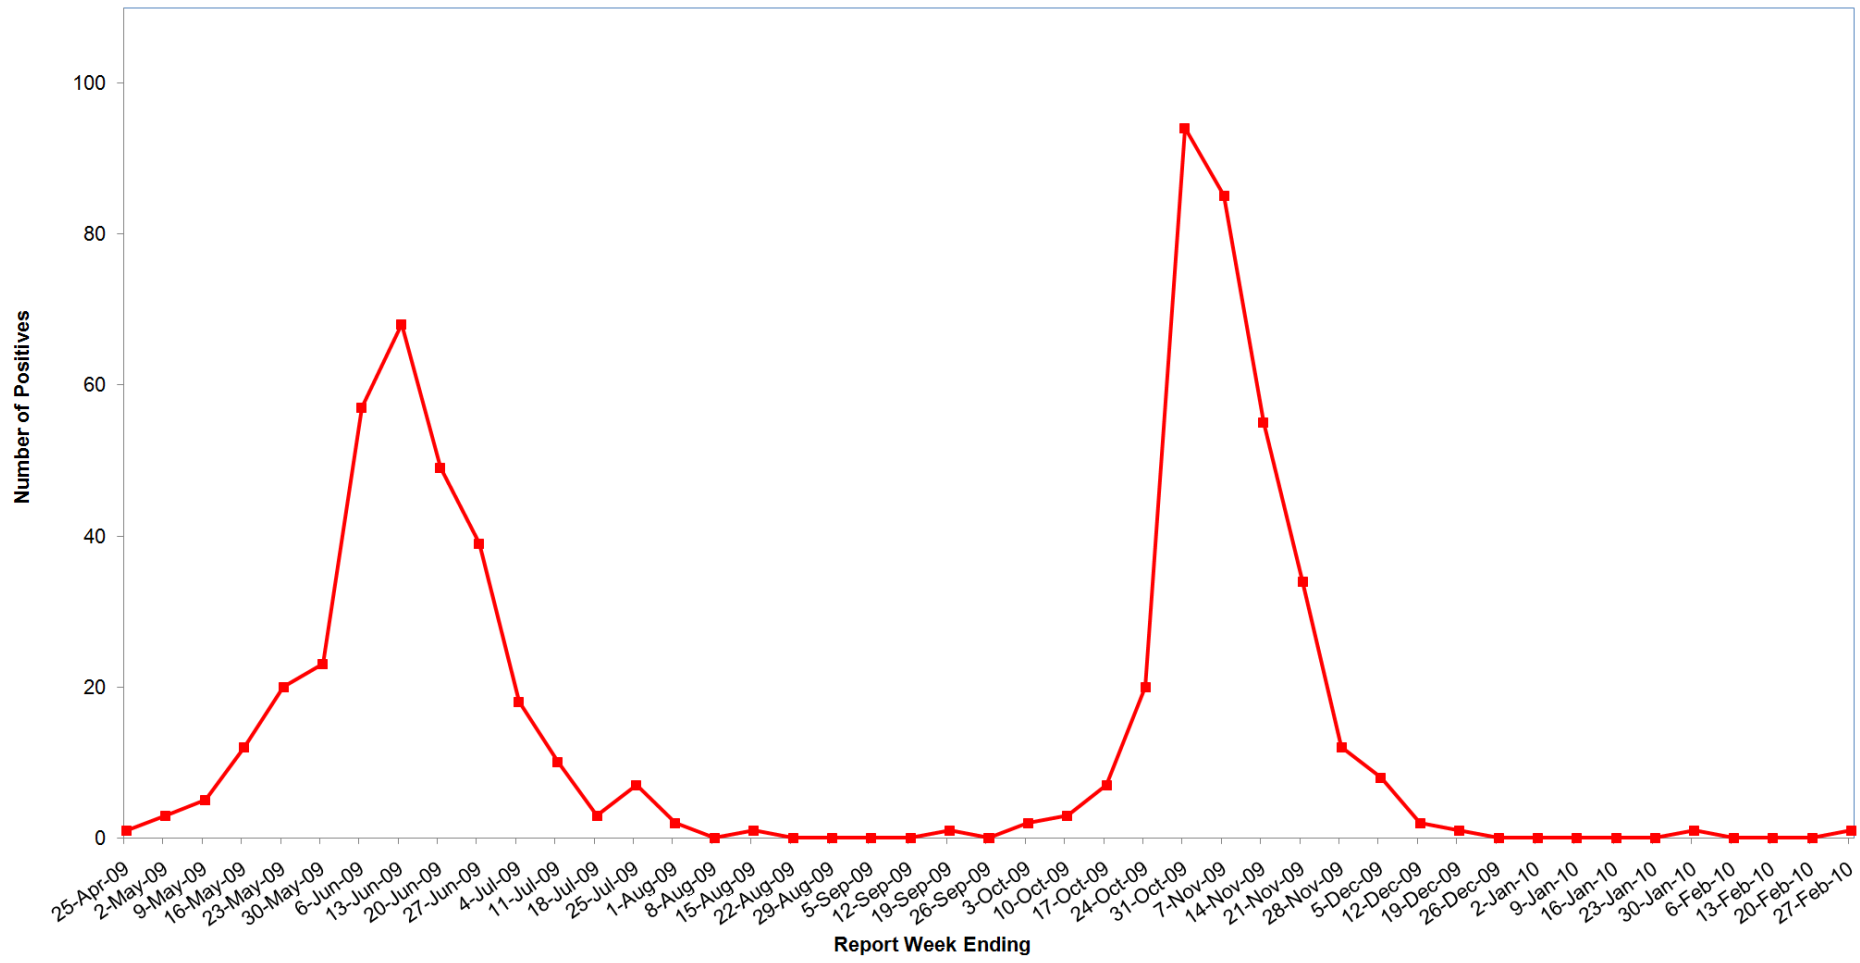

STROBE Statement—Checklist of items that should be included in reports of *cross-sectional studies*

|                              | Item No | Recommendation                                                                                                                                                                                                                                                                                                                                                                                                |
|------------------------------|---------|---------------------------------------------------------------------------------------------------------------------------------------------------------------------------------------------------------------------------------------------------------------------------------------------------------------------------------------------------------------------------------------------------------------|
| <b>Title and abstract</b>    | 1 X     | (a) Indicate the study's design with a commonly used term in the title or the abstract<br>(b) Provide in the abstract an informative and balanced summary of what was done and what was found                                                                                                                                                                                                                 |
| <b>Introduction</b>          |         |                                                                                                                                                                                                                                                                                                                                                                                                               |
| Background/rationale         | 2 X     | Explain the scientific background and rationale for the investigation being reported                                                                                                                                                                                                                                                                                                                          |
| Objectives                   | 3 X     | State specific objectives, including any prespecified hypotheses                                                                                                                                                                                                                                                                                                                                              |
| <b>Methods</b>               |         |                                                                                                                                                                                                                                                                                                                                                                                                               |
| Study design                 | 4 X     | Present key elements of study design early in the paper                                                                                                                                                                                                                                                                                                                                                       |
| Setting                      | 5 X     | Describe the setting, locations, and relevant dates, including periods of recruitment, exposure, follow-up, and data collection                                                                                                                                                                                                                                                                               |
| Participants                 | 6 X     | (a) Give the eligibility criteria, and the sources and methods of selection of participants                                                                                                                                                                                                                                                                                                                   |
| Variables                    | 7 X     | Clearly define all outcomes, exposures, predictors, potential confounders, and effect modifiers. Give diagnostic criteria, if applicable                                                                                                                                                                                                                                                                      |
| Data sources/<br>measurement | 8* X    | For each variable of interest, give sources of data and details of methods of assessment (measurement). Describe comparability of assessment methods if there is more than one group                                                                                                                                                                                                                          |
| Bias                         | 9 X     | Describe any efforts to address potential sources of bias                                                                                                                                                                                                                                                                                                                                                     |
| Study size                   | 10 X    | Explain how the study size was arrived at                                                                                                                                                                                                                                                                                                                                                                     |
| Quantitative variables       | 11 X    | Explain how quantitative variables were handled in the analyses. If applicable, describe which groupings were chosen and why                                                                                                                                                                                                                                                                                  |
| Statistical methods          | 12 X    | (a) Describe all statistical methods, including those used to control for confounding<br>(b) Describe any methods used to examine subgroups and interactions<br>(c) Explain how missing data were addressed<br>(d) If applicable, describe analytical methods taking account of sampling strategy<br>(e) Describe any sensitivity analyses                                                                    |
| <b>Results</b>               |         |                                                                                                                                                                                                                                                                                                                                                                                                               |
| Participants                 | 13* X   | (a) Report numbers of individuals at each stage of study—eg numbers potentially eligible, examined for eligibility, confirmed eligible, included in the study, completing follow-up, and analysed<br>(b) Give reasons for non-participation at each stage<br>(c) Consider use of a flow diagram                                                                                                               |
| Descriptive data             | 14* X   | (a) Give characteristics of study participants (eg demographic, clinical, social) and information on exposures and potential confounders<br>(b) Indicate number of participants with missing data for each variable of interest                                                                                                                                                                               |
| Outcome data                 | 15* X   | Report numbers of outcome events or summary measures                                                                                                                                                                                                                                                                                                                                                          |
| Main results                 | 16 X    | (a) Give unadjusted estimates and, if applicable, confounder-adjusted estimates and their precision (eg, 95% confidence interval). Make clear which confounders were adjusted for and why they were included<br>(b) Report category boundaries when continuous variables were categorized<br>(c) If relevant, consider translating estimates of relative risk into absolute risk for a meaningful time period |
| Other analyses               | 17 X    | Report other analyses done—eg analyses of subgroups and interactions, and sensitivity analyses                                                                                                                                                                                                                                                                                                                |

1  
2  
3  
4  
5  
6  
7  
8  
9  
10  
11  
12  
13  
14  
15  
16  
17  
18  
19  
20  
21  
22  
23  
24  
25  
26  
27  
28  
29  
30  
31  
32  
33  
34  
35  
36  
37  
38  
39  
40  
41  
42  
43  
44  
45  
46  
47  
48  
49  
50  
51  
52  
53  
54  
55  
56  
57  
58  
59  
60

| <b>Discussion</b>        |      |                                                                                                                                                                            |
|--------------------------|------|----------------------------------------------------------------------------------------------------------------------------------------------------------------------------|
| Key results              | 18 X | Summarise key results with reference to study objectives                                                                                                                   |
| Limitations              | 19 X | Discuss limitations of the study, taking into account sources of potential bias or imprecision. Discuss both direction and magnitude of any potential bias                 |
| Interpretation           | 20 X | Give a cautious overall interpretation of results considering objectives, limitations, multiplicity of analyses, results from similar studies, and other relevant evidence |
| Generalisability         | 21 X | Discuss the generalisability (external validity) of the study results                                                                                                      |
| <b>Other information</b> |      |                                                                                                                                                                            |
| Funding                  | 22 X | Give the source of funding and the role of the funders for the present study and, if applicable, for the original study on which the present article is based              |

\*Give information separately for exposed and unexposed groups.

**Note:** An Explanation and Elaboration article discusses each checklist item and gives methodological background and published examples of transparent reporting. The STROBE checklist is best used in conjunction with this article (freely available on the Web sites of PLoS Medicine at <http://www.plosmedicine.org/>, Annals of Internal Medicine at <http://www.annals.org/>, and Epidemiology at <http://www.epidem.com/>). Information on the STROBE Initiative is available at [www.strobe-statement.org](http://www.strobe-statement.org).
